# Supplementary material for: Comparing the gut microbiome along the gastrointestinal tract of three sympatric species of wild rodents
Source: PubMed Central journal article supplement (PMC8497572; doi:10.1038/s41598-021-99379-6), 2021-10-07
Supplement: 41598_2021_99379_MOESM1_ESM.pdf [file 41598_2021_99379_MOESM1_ESM.pdf]

**TITLE: Comparing the gut microbiome along the gastrointestinal tract of three sympatric species of wild rodents**

AUTHORS: Jason L. Anders, Mohamed Abdallah Mohamed Moustafa, Wessam Mohamed Ahmed Mohamed, Takashi Hayakawa, Ryo Nakao, Itsuro Koizumi

**Supplemental Results**

*Most abundant phyla within each gut regions and host species*

Firmicutes, Bacteroidetes, and Epsilonbacteraeota were the most abundant phyla in the cecum, colon, and rectum, of *A. speciosus* and *A. argenteus* accounting for 85 to 95 percent of all microbes, while Firmicutes, Bacteroides, and Spirochaetes were dominant in *M. rufocanus*, although relative abundances of each varied depending on host species and gut region. In the small intestine of *M. rufocanus* the four most abundant phyla were Bacteroides (40.8%), Proteobacteria (20.1%), Firmicutes (18.5%), and Tenericutes (14.8%; Fig. 4). Firmicutes (55.7%), Tenericutes (15.5%), Bacteroides (13.4%), and Proteobacteria (12.4%) made up the largest portion of the microbiome in the small intestine of *A. speciosus* and the most dominant in *A. argenteus* were Tenericutes (26.4%), Proteobacteria (24.2%), Firmicutes (19.9%), and Spirochaetes (15.4%). Notably, Tenericutes and Proteobacteria had higher relative abundance in the small intestine in all three host species as compared to the cecum, colon, or rectum.

## SUPPLEMENTARY FIGURES

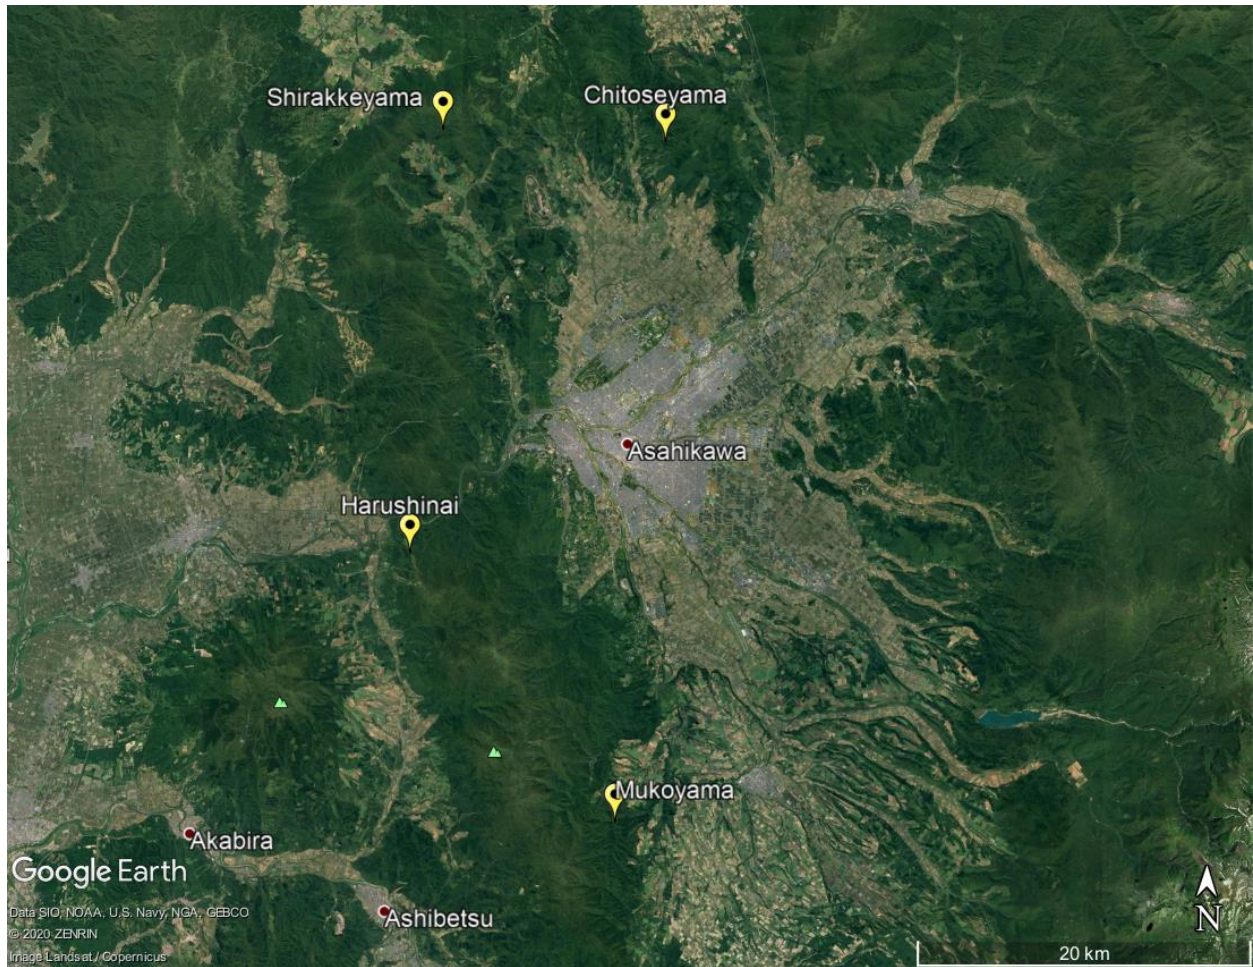

**Fig. S1:** Satellite image of field sites within Kamikawa Chubu National Forest in central Hokkaido. The map was created using Google Earth Pro (version 7.3.3, <https://www.google.com/earth/versions/>). Map data: Google, SIO, NOAA, U.S. Navy, NGA, GEBCO, © 2020 ZENRIN Image Landsat/Copernicus

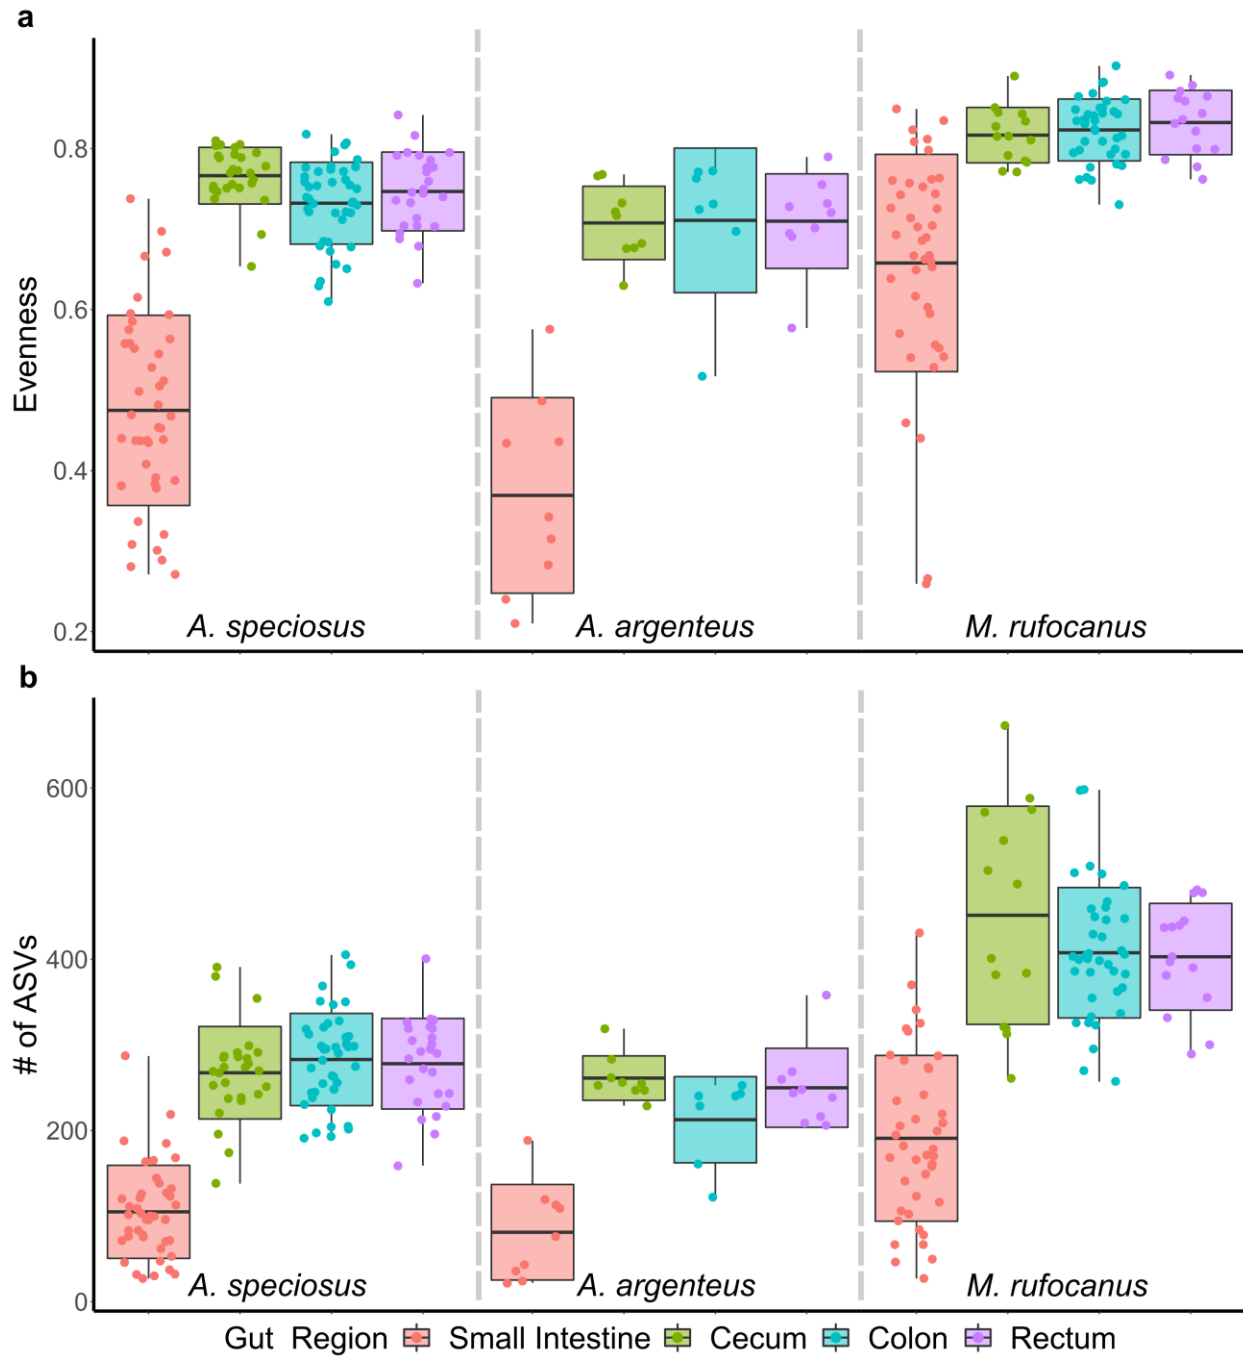

**Fig. S2:** Alpha diversity within each gut region of each species based on a) Pielou's evenness and b) number of ASVs. Dashed lines separate host species.

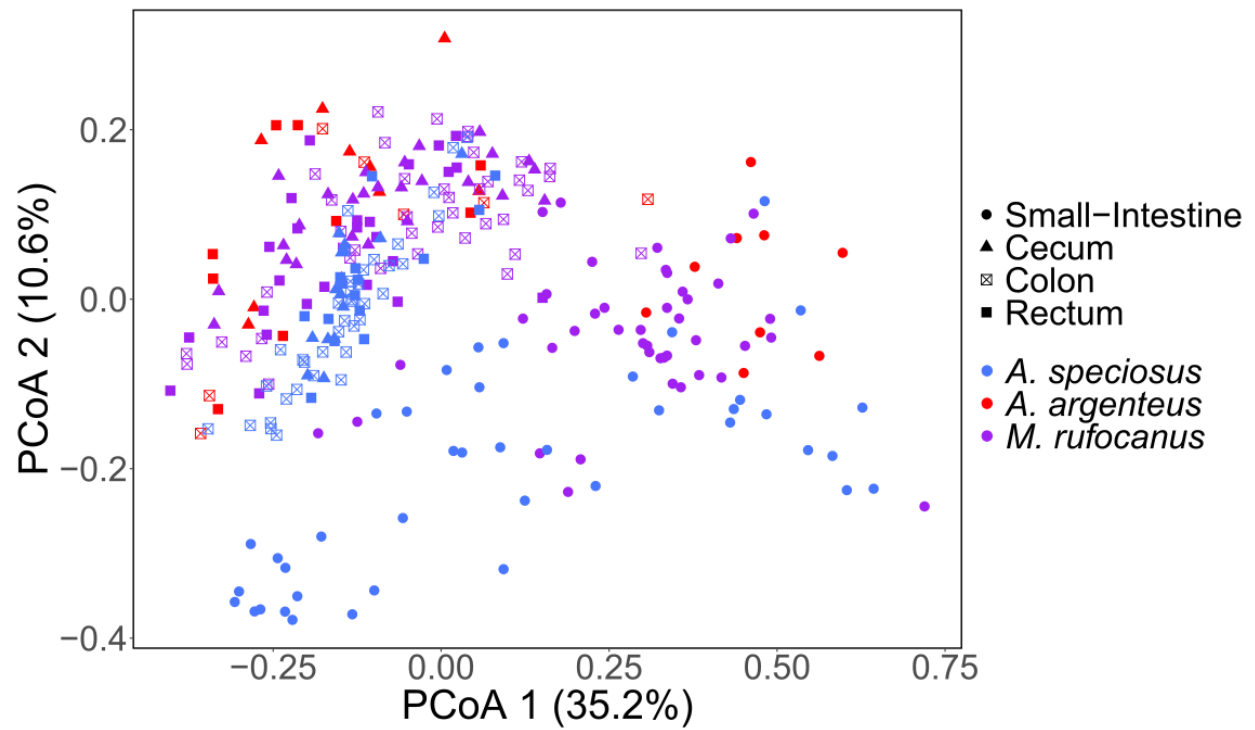

**Fig. S3:** PCoA plot according to weighted UniFrac in which all samples are plotted. Color indicates host species and shape indicates gut region. The percentages in parenthesis is the proportion of variation explained by the PCoA axis.

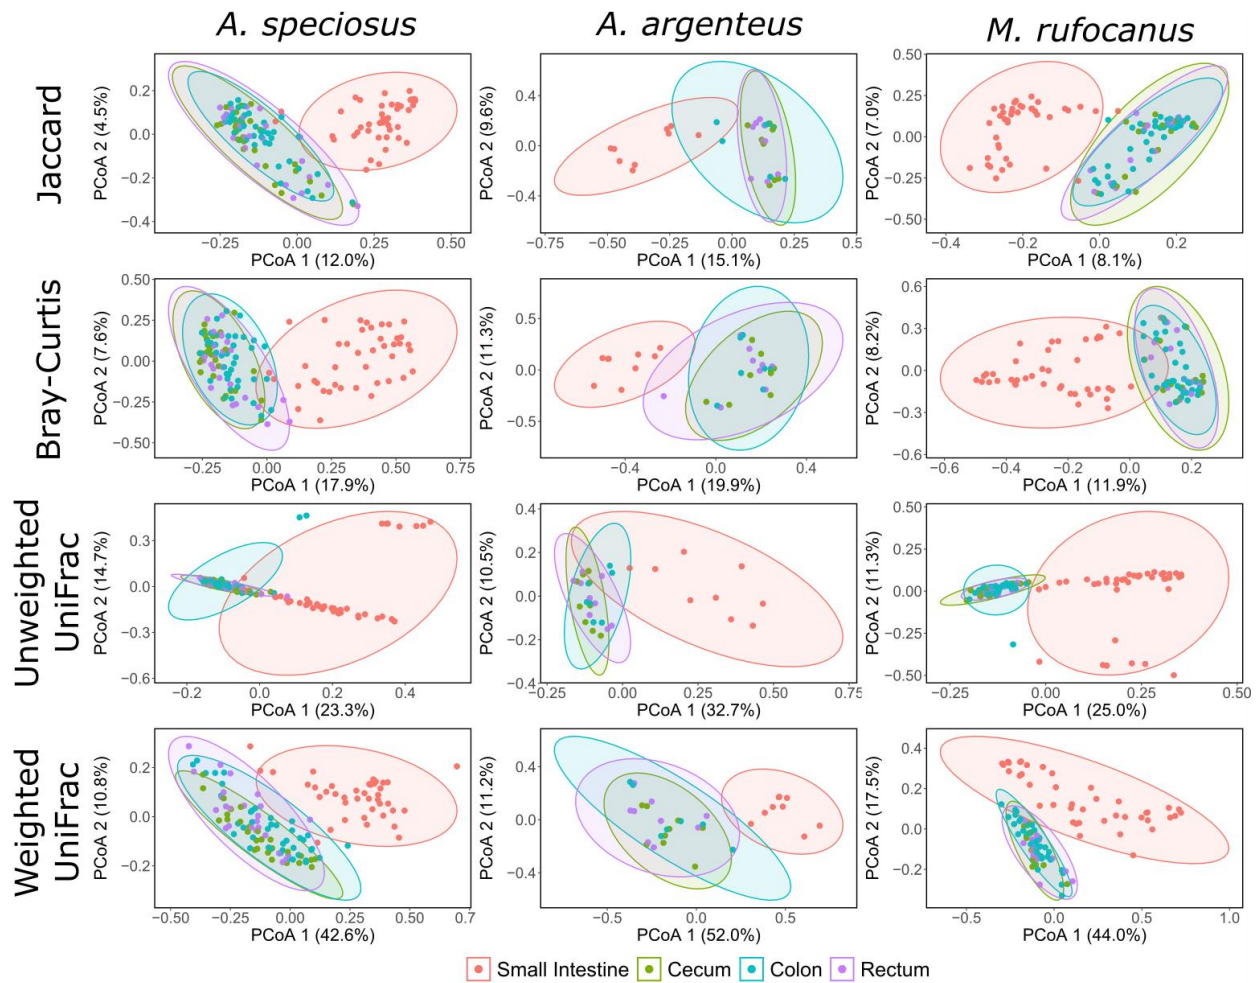

**Fig. S4:** Variation in the gut microbiome among gut regions within each species where column is host species and row is distance metric. Orange is the small intestine, green is cecum, light turquoise is colon, and purple is rectum. Ellipses indicate 95% confidence interval and the percentages in parenthesis is the proportion of variation explained by the PCoA axis.

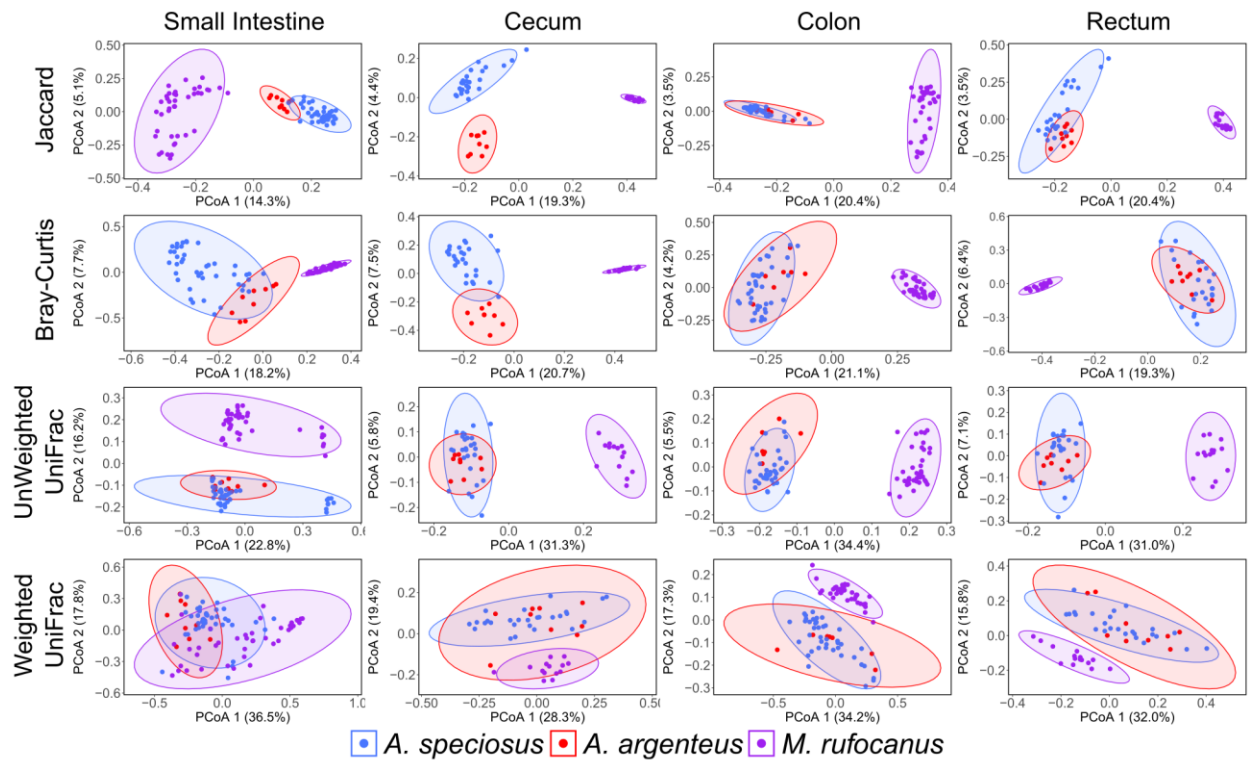

**Fig. S5:** Variation in the gut microbiome among species within each gut region where column is gut region and row is distance metric. Blue is *A. speciosus*, red is *A. argenteus*, and purple is *M. rufocanus*. Ellipses indicate 95% confidence interval, and the percentages in parenthesis is the proportion of variation explained by the PCoA axis.

## SUPPLEMENTARY TABLES

### Field site information

| Site         | Latitude          | Longitude          | <i>A. speciosus</i> | <i>A. argenteus</i> | <i>M. rufocanus</i> |
|--------------|-------------------|--------------------|---------------------|---------------------|---------------------|
| Chitoseyama  | N: 43° 56' 30.64" | E: 142° 24' 10.09" | 6                   | 0                   | 16                  |
| Harushinai   | N: 43° 42' 19.82" | E: 142° 12' 08.28" | 5                   | 0                   | 20                  |
| Mukoyama     | N: 43° 34' 07.41" | E: 142° 21' 34.57" | 11                  | 5                   | 3                   |
| Shirakkeyama | N: 43° 56' 14.15" | E: 142° 13' 21.56" | 20                  | 4                   | 4                   |
| <b>Total</b> |                   |                    | 42                  | 9                   | 43                  |

**Table S1:** Coordinates of each field site and the number of individuals of each species captured at each.

### Number of gut content/fecal matter samples per gut region

| Species             | Small Intestine | Cecum | Colon | Rectum |
|---------------------|-----------------|-------|-------|--------|
| <i>A. speciosus</i> | 42              | 27    | 41    | 25     |
| <i>A. argenteus</i> | 9               | 9     | 7     | 9      |
| <i>M. rufocanus</i> | 43              | 14    | 38    | 16     |
| <b>Total</b>        | 94              | 50    | 86    | 50     |

**Table S2:** The number of gut content or fecal matter (rectum only) samples per gut region per host species.

### Average number of reads per sample

| Species             | All          | Small Intestine | Cecum        | Colon        | Rectum       |
|---------------------|--------------|-----------------|--------------|--------------|--------------|
| <i>A. speciosus</i> | 45406 ± 1004 | 51095 ± 1571    | 35048 ± 2310 | 48865 ± 1301 | 46763 ± 2174 |
| <i>A. argenteus</i> | 46650 ± 2600 | 34063 ± 5044    | 55879 ± 3700 | 38635 ± 3980 | 56242 ± 2960 |
| <i>M. rufocanus</i> | 39956 ± 1543 | 41959 ± 3099    | 45232 ± 4857 | 39674 ± 1649 | 30623 ± 2636 |

**Table S3:** Average number of sequences per sample for each gut region in each species plus or minus standard error of the mean.

**Shannon diversity among gut region (LME results)**

| Species             | Gut Region      | Small Intestine |       |          | Cecum  |       |          | Colon  |       |          | Rectum |       |          |
|---------------------|-----------------|-----------------|-------|----------|--------|-------|----------|--------|-------|----------|--------|-------|----------|
|                     |                 | Est.            | SE    | <i>p</i> | Est.   | SE    | <i>p</i> | Est.   | SE    | <i>p</i> | Est.   | SE    | <i>p</i> |
| <i>A. speciosus</i> | Small intestine | –               | –     | –        | -0.729 | 0.05  | < .001   | -0.688 | 0.044 | < .001   | -0.714 | 0.051 | < .001   |
|                     | Cecum           | 0.729           | 0.05  | < .001   | –      | –     | –        | 0.042  | 0.05  | 0.409    | 0.015  | 0.056 | 0.786    |
|                     | Colon           | 0.688           | 0.044 | < .001   | -0.042 | 0.05  | 0.409    | –      | –     | –        | -0.026 | 0.051 | 0.608    |
|                     | Rectum          | 0.714           | 0.051 | < .001   | -0.015 | 0.056 | 0.786    | 0.026  | 0.051 | 0.608    | –      | –     | –        |
|                     | Sex (male)      | 0.133           | 0.036 | < .001   | 0.133  | 0.036 | < .001   | 0.133  | 0.036 | < .001   | 0.133  | 0.036 | < .001   |
|                     | Age             | 0.065           | 0.043 | 0.136    | 0.065  | 0.043 | 0.136    | 0.065  | 0.043 | 0.136    | 0.065  | 0.043 | 0.136    |
| <i>A. argenteus</i> | Small intestine | –               | –     | –        | -1.006 | 0.11  | < .001   | -0.956 | 0.118 | < .001   | -0.998 | 0.11  | < .001   |
|                     | Cecum           | 1.006           | 0.11  | < .001   | –      | –     | –        | 0.05   | 0.118 | 0.675    | 0.008  | 0.11  | 0.941    |
|                     | Colon           | 0.956           | 0.118 | < .001   | -0.05  | 0.118 | 0.675    | –      | –     | –        | -0.042 | 0.118 | 0.726    |
|                     | Rectum          | 0.998           | 0.11  | < .001   | -0.008 | 0.11  | 0.941    | 0.042  | 0.118 | 0.726    | –      | –     | –        |
|                     | Sex (male)      | -0.302          | 0.081 | < .001   | -0.302 | 0.081 | < .001   | -0.302 | 0.081 | < .001   | -0.302 | 0.081 | < .001   |
|                     | Age             | –               | –     | –        | –      | –     | –        | –      | –     | –        | –      | –     | –        |
| <i>M. rufocanus</i> | Small intestine | –               | –     | –        | -0.004 | 0.083 | 0.963    | -0.423 | 0.05  | < .001   | -0.448 | 0.068 | < .001   |
|                     | Cecum           | 0.451           | 0.07  | < .001   | -0.028 | 0.07  | 0.69     | 0.028  | 0.07  | 0.69     | 0.004  | 0.083 | 0.963    |
|                     | Colon           | 0.423           | 0.05  | < .001   | –      | –     | –        | –      | –     | –        | -0.024 | 0.068 | 0.722    |
|                     | Rectum          | 0.448           | 0.068 | < .001   | -0.451 | 0.07  | < .001   | 0.024  | 0.068 | 0.722    | –      | –     | –        |
|                     | Sex (male)      | 0.03            | 0.045 | 0.508    | 0.03   | 0.045 | 0.508    | 0.03   | 0.045 | 0.508    | 0.03   | 0.045 | 0.508    |
|                     | Age             | -0.044          | 0.053 | 0.405    | -0.044 | 0.053 | 0.405    | -0.044 | 0.053 | 0.405    | -0.044 | 0.053 | 0.405    |

**Table S4:** Linear mixed effects model results for Shannon diversity comparing gut region within each species, values rounded to the thousandth place. Column is the response variable, rows are explanatory variables. Bold text indicates statistical significance.



**Faith's PD among gut region (LME results)**

| Species             | Gut Region      | Small Intestine |       |              | Cecum   |       |              | Colon  |       |              | Feces  |       |              |
|---------------------|-----------------|-----------------|-------|--------------|---------|-------|--------------|--------|-------|--------------|--------|-------|--------------|
|                     |                 | Est.            | SE    | <i>p</i>     | Est.    | SE    | <i>p</i>     | Est.   | SE    | <i>p</i>     | Est.   | SE    | <i>p</i>     |
| <i>A. speciosus</i> | Small intestine | –               | –     | –            | -0.289  | 0.052 | < .001       | -0.344 | 0.046 | < .001       | -0.327 | 0.054 | < .001       |
|                     | Cecum           | 0.289           | 0.052 | < .001       | –       | –     | –            | -0.056 | 0.053 | 0.294        | -0.039 | 0.058 | 0.507        |
|                     | Colon           | 0.344           | 0.046 | < .001       | 0.056   | 0.053 | 0.294        | –      | –     | –            | 0.017  | 0.054 | 0.755        |
|                     | Rectum          | 0.327           | 0.054 | < .001       | 0.039   | 0.058 | 0.507        | -0.017 | 0.054 | 0.755        | –      | –     | –            |
|                     | Sex (male)      | 0.106           | 0.038 | <b>0.006</b> | 0.106   | 0.038 | <b>0.006</b> | 0.106  | 0.038 | <b>0.006</b> | 0.106  | 0.038 | <b>0.006</b> |
|                     | Age             | 0.013           | 0.047 | 0.784        | 0.013   | 0.047 | 0.784        | 0.013  | 0.047 | 0.784        | 0.013  | 0.047 | 0.784        |
| <i>A. argenteus</i> | Small intestine | –               | –     | –            | -0.406  | 0.083 | < .001       | -0.31  | 0.088 | <b>0.001</b> | -0.405 | 0.083 | < .001       |
|                     | Cecum           | 0.406           | 0.083 | < .001       | –       | –     | –            | 0.096  | 0.088 | 0.287        | 0.0004 | 0.083 | 0.996        |
|                     | Colon           | 0.31            | 0.088 | <b>0.002</b> | -0.096  | 0.088 | 0.287        | –      | –     | –            | -0.096 | 0.088 | 0.289        |
|                     | Rectum          | 0.405           | 0.083 | < .001       | -0.0004 | 0.083 | 0.996        | 0.096  | 0.088 | 0.289        | –      | –     | –            |
|                     | Sex (male)      | -0.176          | 0.061 | <b>0.007</b> | -0.176  | 0.061 | <b>0.007</b> | -0.176 | 0.061 | <b>0.007</b> | -0.176 | 0.061 | <b>0.007</b> |
|                     | Age             | –               | –     | –            | –       | –     | –            | –      | –     | –            | –      | –     | –            |
| <i>M. rufocanus</i> | Small intestine | –               | –     | –            | -0.389  | 0.066 | < .001       | -0.293 | 0.047 | < .001       | -0.331 | 0.064 | < .001       |
|                     | Cecum           | 0.389           | 0.066 | < .001       | –       | –     | –            | 0.096  | 0.067 | 0.155        | 0.058  | 0.078 | 0.459        |
|                     | Colon           | 0.293           | 0.047 | < .001       | -0.096  | 0.067 | 0.155        | –      | –     | –            | -0.038 | 0.065 | 0.559        |
|                     | Rectum          | 0.331           | 0.064 | < .001       | -0.058  | 0.078 | 0.459        | 0.038  | 0.065 | 0.559        | –      | –     | –            |
|                     | Sex (male)      | 0.021           | 0.043 | 0.628        | 0.021   | 0.043 | 0.628        | 0.021  | 0.043 | 0.628        | 0.021  | 0.043 | 0.628        |
|                     | Age             | -0.07           | 0.051 | 0.17         | -0.07   | 0.051 | 0.17         | -0.07  | 0.051 | 0.17         | -0.07  | 0.051 | 0.17         |

**Table S5:** Linear mixed effects model results for Faith's phylogenetic diversity comparing gut region within each species, values rounded to the thousandth place. Column is the response variable, rows are explanatory variables. Bold text indicates statistical significance.

**Pielou's evenness among gut region (LME results)**

| Species             | Gut Region      | Small Intestine |       |              | Cecum  |       |              | Colon  |       |              | Rectum |       |              |
|---------------------|-----------------|-----------------|-------|--------------|--------|-------|--------------|--------|-------|--------------|--------|-------|--------------|
|                     |                 | Est.            | SE    | <i>p</i>     | Est.   | SE    | <i>p</i>     | Est.   | SE    | <i>p</i>     | Est.   | SE    | <i>p</i>     |
| <i>A. speciosus</i> | Small intestine | –               | –     | –            | -0.512 | 0.037 | < .001       | -0.461 | 0.033 | < .001       | -0.487 | 0.038 | < .001       |
|                     | Cecum           | 0.512           | 0.037 | < .001       | –      | –     | –            | 0.051  | 0.038 | 0.178        | 0.025  | 0.042 | 0.556        |
|                     | Colon           | 0.461           | 0.033 | < .001       | -0.051 | 0.038 | 0.178        | –      | –     | –            | -0.026 | 0.039 | 0.498        |
|                     | Rectum          | 0.487           | 0.038 | < .001       | -0.025 | 0.042 | 0.556        | 0.026  | 0.039 | 0.498        | –      | –     | –            |
|                     | Sex (male)      | 0.07            | 0.027 | <b>0.011</b> | 0.07   | 0.027 | <b>0.011</b> | 0.07   | 0.027 | <b>0.011</b> | 0.07   | 0.027 | <b>0.011</b> |
|                     | Age             | 0.043           | 0.032 | 0.191        | 0.043  | 0.032 | 0.191        | 0.043  | 0.032 | 0.191        | 0.043  | 0.032 | 0.191        |
| <i>A. argenteus</i> | Small intestine | –               | –     | –            | -0.698 | 0.078 | < .001       | -0.694 | 0.083 | < .001       | -0.7   | 0.078 | < .001       |
|                     | Cecum           | 0.698           | 0.078 | < .001       | –      | –     | –            | 0.005  | 0.083 | 0.954        | -0.001 | 0.078 | 0.983        |
|                     | Colon           | 0.694           | 0.083 | < .001       | -0.005 | 0.083 | 0.954        | –      | –     | –            | -0.007 | 0.083 | 0.938        |
|                     | Rectum          | 0.7             | 0.078 | < .001       | 0.002  | 0.078 | 0.983        | 0.007  | 0.083 | 0.938        | –      | –     | –            |
|                     | Sex (male)      | -0.199          | 0.057 | <b>0.001</b> | -0.199 | 0.057 | <b>0.002</b> | -0.199 | 0.057 | <b>0.002</b> | -0.199 | 0.057 | <b>0.002</b> |
|                     | Age             | –               | –     | –            | –      | –     | –            | –      | –     | –            | –      | –     | –            |
| <i>M. rufocanus</i> | Small intestine | –               | –     | –            | -0.259 | 0.051 | < .001       | -0.252 | 0.036 | < .001       | -0.273 | 0.049 | < .001       |
|                     | Cecum           | 0.259           | 0.051 | < .001       | –      | –     | –            | 0.007  | 0.051 | 0.895        | -0.014 | 0.06  | 0.814        |
|                     | Colon           | 0.252           | 0.036 | < .001       | -0.007 | 0.051 | 0.895        | –      | –     | –            | -0.021 | 0.049 | 0.675        |
|                     | Rectum          | 0.273           | 0.049 | < .001       | 0.014  | 0.06  | 0.814        | 0.021  | 0.049 | 0.675        | –      | –     | –            |
|                     | Sex (male)      | 0.038           | 0.032 | 0.24         | 0.038  | 0.032 | 0.24         | 0.038  | 0.032 | 0.24         | 0.038  | 0.032 | 0.24         |
|                     | Age             | -0.024          | 0.038 | 0.538        | -0.024 | 0.038 | 0.536        | -0.024 | 0.038 | 0.536        | -0.024 | 0.038 | 0.536        |

**Table S6:** Linear mixed effects model results for Pielou's evenness comparing gut region within each species, values rounded to the thousandth place. Column is the response variable, rows are explanatory variables. Bold text indicates statistical significance.

**Number of ASVs among gut region (LME results)**

| Species             | Gut Region      | Small Intestine |       |              | Cecum  |       |              | Colon  |       |              | Rectum  |       |              |
|---------------------|-----------------|-----------------|-------|--------------|--------|-------|--------------|--------|-------|--------------|---------|-------|--------------|
|                     |                 | Est.            | SE    | <i>p</i>     | Est.   | SE    | <i>p</i>     | Est.   | SE    | <i>p</i>     | Est.    | SE    | <i>p</i>     |
| <i>A. speciosus</i> | Small intestine | –               | –     | –            | -1.056 | 0.081 | < .001       | -1.107 | 0.071 | < .001       | -1.108  | 0.083 | < .001       |
|                     | Cecum           | 1.056           | 0.081 | < .001       | –      | –     | –            | -0.051 | 0.081 | 0.531        | -0.051  | 0.09  | 0.572        |
|                     | Colon           | 1.107           | 0.071 | < .001       | 0.051  | 0.081 | 0.531        | –      | –     | –            | -0.0002 | 0.083 | 0.998        |
|                     | Rectum          | 1.108           | 0.083 | < .001       | 0.051  | 0.09  | 0.572        | 0.0002 | 0.083 | 0.998        | –       | –     | –            |
|                     | Sex (male)      | 0.3             | 0.059 | < .001       | 0.3    | 0.059 | < .001       | 0.3    | 0.059 | < .001       | 0.3     | 0.059 | < .001       |
|                     | Age             | 0.120           | 0.07  | 0.087        | 0.12   | 0.07  | 0.087        | 0.12   | 0.07  | 0.087        | 0.12    | 0.07  | 0.087        |
| <i>A. argenteus</i> | Small intestine | –               | –     | –            | -1.408 | 0.174 | < .001       | -1.169 | 0.187 | < .001       | -1.354  | 0.174 | < .001       |
|                     | Cecum           | 1.408           | 0.174 | < .001       | –      | –     | –            | 0.239  | 0.187 | 0.211        | 0.054   | 0.174 | 0.761        |
|                     | Colon           | 1.169           | 0.187 | < .001       | -0.239 | 0.187 | 0.211        | –      | –     | –            | -0.185  | 0.187 | 0.33         |
|                     | Rectum          | 1.354           | 0.174 | < .001       | -0.054 | 0.174 | 0.761        | 0.185  | 0.187 | 0.33         | –       | –     | –            |
|                     | Sex (male)      | -0.432          | 0.128 | <b>0.002</b> | -0.432 | 0.128 | <b>0.002</b> | -0.432 | 0.128 | <b>0.002</b> | -0.432  | 0.128 | <b>0.002</b> |
|                     | Age             | –               | –     | –            | –      | –     | –            | –      | –     | –            | –       | –     | –            |
| <i>M. rufocanus</i> | Small intestine | –               | –     | –            | -1.028 | 0.129 | < .001       | -0.905 | 0.092 | < .001       | -0.92   | 0.124 | < .001       |
|                     | Cecum           | 1.028           | 0.129 | < .001       | –      | –     | –            | 0.123  | 0.129 | 0.343        | 0.108   | 0.151 | 0.478        |
|                     | Colon           | 0.905           | 0.092 | < .001       | -0.123 | 0.129 | 0.343        | –      | –     | –            | -0.015  | 0.125 | 0.904        |
|                     | Rectum          | 0.920           | 0.124 | < .001       | -0.108 | 0.151 | 0.478        | 0.015  | 0.125 | 0.904        | –       | –     | –            |
|                     | Sex (male)      | -0.043          | 0.082 | 0.6          | -0.043 | 0.082 | 0.6          | -0.043 | 0.082 | 0.6          | -0.043  | 0.082 | 0.6          |
|                     | Age             | -0.11           | 0.097 | 0.261        | -0.11  | 0.097 | 0.261        | -0.11  | 0.097 | 0.261        | -0.11   | 0.097 | 0.261        |

**Table S7:** Linear mixed effects model results for the number of ASVs comparing gut region within each species, values rounded to the thousandth place. Column is the response variable, rows are explanatory variables. Bold text indicates statistical significance.

### Shannon's diversity among species (LME results)

| Gut Region      | Species             | <i>A. speciosus</i> |       |              | <i>A. argenteus</i> |       |              | <i>M. rufocanus</i> |       |          |
|-----------------|---------------------|---------------------|-------|--------------|---------------------|-------|--------------|---------------------|-------|----------|
|                 |                     | Est.                | SE    | <i>p</i>     | Est.                | SE    | <i>p</i>     | Est.                | SE    | <i>p</i> |
| Rectum          | <i>A. speciosus</i> | –                   | –     | –            | 0.064               | 0.036 | 0.079        | -0.165              | 0.035 | < .001   |
|                 | <i>A. argenteus</i> | -0.064              | 0.036 | 0.079        | –                   | –     | –            | -0.229              | 0.047 | < .001   |
|                 | <i>M. rufocanus</i> | 0.165               | 0.035 | < .001       | 0.229               | 0.047 | < .001       | –                   | –     | –        |
|                 | Sex (male)          | 0.004               | 0.026 | 0.877        | 0.004               | 0.026 | 0.877        | 0.004               | 0.026 | 0.877    |
|                 | Age                 | 0.019               | 0.037 | 0.618        | 0.019               | 0.037 | 0.618        | 0.019               | 0.037 | 0.618    |
| Colon           | <i>A. speciosus</i> | –                   | –     | –            | 0.084               | 0.04  | <b>0.039</b> | -0.174              | 0.025 | < .001   |
|                 | <i>A. argenteus</i> | -0.084              | 0.04  | <b>0.039</b> | –                   | –     | –            | -0.259              | 0.045 | < .001   |
|                 | <i>M. rufocanus</i> | 0.174               | 0.025 | < .001       | 0.259               | 0.045 | < .001       | –                   | –     | –        |
|                 | Sex (male)          | -0.001              | 0.021 | 0.981        | -0.001              | 0.021 | 0.981        | -5E-04              | 0.021 | 0.981    |
|                 | Age                 | 0.015               | 0.024 | 0.554        | 0.014               | 0.024 | 0.554        | 0.014               | 0.024 | 0.554    |
| Cecum           | <i>A. speciosus</i> | –                   | –     | –            | 0.079               | 0.029 | <b>0.009</b> | -0.15               | 0.03  | < .001   |
|                 | <i>A. argenteus</i> | -0.079              | 0.029 | <b>0.009</b> | –                   | –     | –            | -0.228              | 0.039 | < .001   |
|                 | <i>M. rufocanus</i> | 0.15                | 0.03  | < .001       | 0.228               | 0.039 | < .001       | –                   | –     | –        |
|                 | Sex (male)          | 0.014               | 0.021 | 0.507        | 0.013               | 0.021 | 0.507        | 0.014               | 0.021 | 0.507    |
|                 | Age                 | -0.002              | 0.03  | 0.955        | -0.002              | 0.03  | 0.955        | -0.002              | 0.03  | 0.955    |
| Small Intestine | <i>A. speciosus</i> | –                   | –     | –            | 0.372               | 0.138 | <b>0.009</b> | -0.476              | 0.092 | < .001   |
|                 | <i>A. argenteus</i> | -0.373              | 0.138 | <b>0.009</b> | –                   | –     | –            | -0.849              | 0.153 | < .001   |
|                 | <i>M. rufocanus</i> | 0.476               | 0.092 | < .001       | 0.849               | 0.153 | < .001       | –                   | –     | –        |
|                 | Sex (male)          | 0.07                | 0.077 | 0.368        | 0.07                | 0.077 | 0.368        | 0.07                | 0.077 | 0.368    |
|                 | Age                 | -0.048              | 0.092 | 0.604        | -0.048              | 0.092 | 0.604        | -0.048              | 0.092 | 0.604    |

**Table S8:** Linear mixed effects model results for Shannon diversity comparing each gut region among species, values rounded to the thousandth place. Column is the response variable, rows are explanatory variables. Bold text indicates statistical significance.

**Faith's PD among species (LME results)**

| Gut Region             | Species             | <i>A. speciosus</i> |       |                 | <i>A. argenteus</i> |       |                 | <i>M. rufocanus</i> |       |                 |
|------------------------|---------------------|---------------------|-------|-----------------|---------------------|-------|-----------------|---------------------|-------|-----------------|
|                        |                     | Est.                | SE    | <i>p</i>        | Est.                | SE    | <i>p</i>        | Est.                | SE    | <i>p</i>        |
| <b>Rectum</b>          | <i>A. speciosus</i> | –                   | –     | –               | 0.053               | 0.036 | 0.152           | -0.143              | 0.035 | <b>&lt;.001</b> |
|                        | <i>A. argenteus</i> | -0.053              | 0.036 | 0.152           | –                   | –     | –               | -0.196              | 0.046 | <b>&lt;.001</b> |
|                        | <i>M. rufocanus</i> | 0.143               | 0.035 | <b>&lt;.001</b> | 0.196               | 0.046 | <b>&lt;.001</b> | –                   | –     | –               |
|                        | Sex (male)          | -0.022              | 0.027 | 0.418           | -0.022              | 0.027 | 0.418           | -0.022              | 0.027 | 0.418           |
|                        | Age                 | -0.044              | 0.036 | 0.234           | -0.044              | 0.036 | 0.234           | -0.044              | 0.036 | 0.234           |
| <b>Colon</b>           | <i>A. speciosus</i> | –                   | –     | –               | 0.147               | 0.046 | <b>0.002</b>    | -0.096              | 0.029 | <b>0.001</b>    |
|                        | <i>A. argenteus</i> | -0.147              | 0.046 | <b>0.002</b>    | –                   | –     | –               | -0.242              | 0.051 | <b>&lt;.001</b> |
|                        | <i>M. rufocanus</i> | 0.096               | 0.029 | <b>0.001</b>    | 0.242               | 0.051 | <b>&lt;.001</b> | –                   | –     | –               |
|                        | Sex (male)          | 0.011               | 0.024 | 0.643           | 0.011               | 0.024 | 0.643           | 0.011               | 0.024 | 0.643           |
|                        | Age                 | -0.008              | 0.028 | 0.763           | -0.008              | 0.028 | 0.763           | -0.008              | 0.028 | 0.763           |
| <b>Cecum</b>           | <i>A. speciosus</i> | –                   | –     | –               | 0.014               | 0.037 | 0.712           | -0.228              | 0.038 | <b>&lt;.001</b> |
|                        | <i>A. argenteus</i> | -0.014              | 0.037 | 0.712           | –                   | –     | –               | -0.242              | 0.05  | <b>&lt;.001</b> |
|                        | <i>M. rufocanus</i> | 0.228               | 0.038 | <b>&lt;.001</b> | 0.242               | 0.05  | <b>&lt;.001</b> | –                   | –     | –               |
|                        | Sex (male)          | 0.003               | 0.027 | 0.906           | 0.003               | 0.027 | 0.906           | 0.003               | 0.027 | 0.906           |
|                        | Age                 | -0.054              | 0.039 | 0.176           | -0.054              | 0.039 | 0.176           | -0.054              | 0.039 | 0.176           |
| <b>Small Intestine</b> | <i>A. speciosus</i> | –                   | –     | –               | 0.088               | 0.124 | 0.478           | -0.057              | 0.095 | 0.55            |
|                        | <i>A. argenteus</i> | -0.088              | 0.124 | 0.478           | –                   | –     | –               | -0.146              | 0.154 | 0.346           |
|                        | <i>M. rufocanus</i> | 0.057               | 0.095 | 0.55            | 0.146               | 0.154 | 0.346           | –                   | –     | –               |
|                        | Sex (male)          | 0.062               | 0.067 | 0.361           | 0.062               | 0.067 | 0.361           | 0.062               | 0.067 | 0.361           |
|                        | Age                 | -0.072              | 0.083 | 0.383           | -0.072              | 0.083 | 0.383           | -0.072              | 0.083 | 0.383           |

**Table S9:** Linear mixed effects model results for Faith's phylogenetic diversity comparing each gut region among species, values rounded to the thousandth place. Column is the response variable, rows are explanatory variables. Bold text indicates statistical significance.

**Pielou's evenness among species (LME results)**

| Gut Region             | Species             | <i>A. speciosus</i> |       |                  | <i>A. argenteus</i> |       |                  | <i>M. rufocanus</i> |       |                  |
|------------------------|---------------------|---------------------|-------|------------------|---------------------|-------|------------------|---------------------|-------|------------------|
|                        |                     | Est.                | SE    | <i>p</i>         | Est.                | SE    | <i>p</i>         | Est.                | SE    | <i>p</i>         |
| <b>Rectum</b>          | <i>A. speciosus</i> | –                   | –     | –                | 0.046               | 0.025 | 0.073            | -0.099              | 0.025 | <b>&lt; .001</b> |
|                        | <i>A. argenteus</i> | -0.046              | 0.025 | 0.073            | –                   | –     | –                | -0.145              | 0.033 | <b>&lt; .001</b> |
|                        | <i>M. rufocanus</i> | 0.1                 | 0.025 | <b>&lt; .001</b> | 0.145               | 0.033 | <b>&lt; .001</b> | –                   | –     | –                |
|                        | Sex (male)          | -0.003              | 0.018 | 0.858            | -0.003              | 0.018 | 0.858            | -0.003              | 0.018 | 0.858            |
|                        | Age                 | 0.02                | 0.026 | 0.459            | 0.02                | 0.026 | 0.459            | 0.02                | 0.026 | 0.459            |
| <b>Colon</b>           | <i>A. speciosus</i> | –                   | –     | –                | 0.028               | 0.029 | 0.339            | -0.109              | 0.019 | <b>&lt; .001</b> |
|                        | <i>A. argenteus</i> | -0.028              | 0.029 | 0.339            | –                   | –     | –                | -0.137              | 0.033 | <b>&lt; .001</b> |
|                        | <i>M. rufocanus</i> | 0.109               | 0.019 | <b>&lt; .001</b> | 0.137               | 0.033 | <b>&lt; .001</b> | –                   | –     | –                |
|                        | Sex (male)          | -0.004              | 0.015 | 0.803            | -0.004              | 0.015 | 0.803            | -0.004              | 0.015 | 0.803            |
|                        | Age                 | 0.015               | 0.018 | 0.412            | 0.015               | 0.018 | 0.412            | 0.015               | 0.018 | 0.412            |
| <b>Cecum</b>           | <i>A. speciosus</i> | –                   | –     | –                | 0.078               | 0.019 | <b>&lt; .001</b> | -0.054              | 0.02  | <b>0.009</b>     |
|                        | <i>A. argenteus</i> | -0.078              | 0.019 | <b>&lt; .001</b> | –                   | –     | –                | -0.132              | 0.026 | <b>&lt; .001</b> |
|                        | <i>M. rufocanus</i> | 0.054               | 0.02  | <b>0.009</b>     | 0.132               | 0.026 | <b>&lt; .001</b> | –                   | –     | –                |
|                        | Sex (male)          | 0.003               | 0.013 | 0.83             | 0.003               | 0.013 | 0.83             | 0.003               | 0.013 | 0.83             |
|                        | Age                 | 0.012               | 0.02  | 0.563            | 0.012               | 0.02  | 0.563            | 0.012               | 0.02  | 0.563            |
| <b>Small Intestine</b> | <i>A. speciosus</i> | –                   | –     | –                | 0.273               | 0.1   | <b>0.008</b>     | -0.341              | 0.066 | <b>&lt; .001</b> |
|                        | <i>A. argenteus</i> | -0.273              | 0.1   | <b>0.008</b>     | –                   | –     | –                | -0.614              | 0.11  | <b>&lt; .001</b> |
|                        | <i>M. rufocanus</i> | 0.341               | 0.066 | <b>&lt; .001</b> | 0.614               | 0.11  | <b>&lt; .001</b> | –                   | –     | –                |
|                        | Sex (male)          | 0.055               | 0.056 | 0.327            | 0.055               | 0.056 | 0.327            | 0.055               | 0.056 | 0.327            |
|                        | Age                 | -0.018              | 0.066 | 0.785            | -0.018              | 0.066 | 0.785            | -0.018              | 0.066 | 0.785            |

**Table S10:** Linear mixed effects model results for Pielou's evenness comparing each gut region among species, values rounded to the thousandth place. Column is the response variable, rows are explanatory variables. Bold text indicates statistical significance.

### Number of ASVs among species (LME results)

| Gut Region             | Species             | <i>A. speciosus</i> |       |          | <i>A. argenteus</i> |       |          | <i>M. rufocanus</i> |       |          |
|------------------------|---------------------|---------------------|-------|----------|---------------------|-------|----------|---------------------|-------|----------|
|                        |                     | Est.                | SE    | <i>p</i> | Est.                | SE    | <i>p</i> | Est.                | SE    | <i>p</i> |
| <b>Rectum</b>          | <i>A. speciosus</i> | –                   | –     | –        | 0.1                 | 0.074 | 0.188    | -0.377              | 0.072 | < .001   |
|                        | <i>A. argenteus</i> | -0.1                | 0.074 | 0.188    | –                   | –     | –        | -0.477              | 0.094 | < .001   |
|                        | <i>M. rufocanus</i> | 0.377               | 0.072 | < .001   | 0.477               | 0.094 | < .001   | –                   | –     | –        |
|                        | Sex (male)          | 0.037               | 0.055 | 0.499    | 0.037               | 0.055 | 0.499    | 0.037               | 0.055 | 0.499    |
|                        | Age                 | 0.002               | 0.074 | 0.977    | 0.002               | 0.074 | 0.977    | 0.002               | 0.074 | 0.977    |
| <b>Colon</b>           | <i>A. speciosus</i> | –                   | –     | –        | 0.297               | 0.084 | < .001   | -0.369              | 0.051 | < .001   |
|                        | <i>A. argenteus</i> | -0.297              | 0.084 | < .001   | –                   | –     | –        | -0.667              | 0.092 | < .001   |
|                        | <i>M. rufocanus</i> | 0.369               | 0.051 | < .001   | 0.667               | 0.092 | < .001   | –                   | –     | –        |
|                        | Sex (male)          | 0.019               | 0.044 | 0.66     | 0.019               | 0.043 | 0.66     | 0.019               | 0.044 | 0.66     |
|                        | Age                 | -0.002              | 0.051 | 0.962    | -0.002              | 0.051 | 0.962    | -0.002              | 0.051 | 0.962    |
| <b>Cecum</b>           | <i>A. speciosus</i> | –                   | –     | –        | 0.008               | 0.089 | 0.93     | -0.529              | 0.091 | < .001   |
|                        | <i>A. argenteus</i> | -0.008              | 0.089 | 0.93     | –                   | –     | –        | -0.537              | 0.117 | < .001   |
|                        | <i>M. rufocanus</i> | 0.529               | 0.091 | < .001   | 0.537               | 0.117 | < .001   | –                   | –     | –        |
|                        | Sex (male)          | 0.062               | 0.065 | 0.345    | 0.062               | 0.065 | 0.345    | 0.062               | 0.065 | 0.345    |
|                        | Age                 | -0.039              | 0.091 | 0.668    | -0.039              | 0.091 | 0.668    | -0.039              | 0.091 | 0.668    |
| <b>Small Intestine</b> | <i>A. speciosus</i> | –                   | –     | –        | 0.399               | 0.229 | 0.085    | -0.634              | 0.154 | < .001   |
|                        | <i>A. argenteus</i> | -0.399              | 0.229 | 0.085    | –                   | –     | –        | -1.033              | 0.255 | < .001   |
|                        | <i>M. rufocanus</i> | 0.634               | 0.154 | < .001   | 1.033               | 0.255 | < .001   | –                   | –     | –        |
|                        | Sex (male)          | 0.069               | 0.128 | 0.589    | 0.069               | 0.128 | 0.589    | 0.069               | 0.128 | 0.589    |
|                        | Age                 | -0.131              | 0.152 | 0.391    | -0.131              | 0.152 | 0.391    | -0.131              | 0.152 | 0.391    |

**Table S11:** Linear mixed effects model results for the number of ASVs comparing each gut region among species, values rounded to the thousandth place. Column is the response variable, rows are explanatory variables. Bold text indicates statistical significance.

**PERMANOVA all gut regions included, *A. speciosus***

| <b>Dissimilarity Index</b> | <b>Variable</b> | <b>Sum of Squares</b> | <b>R<sup>2</sup></b> | <b>F</b> | <b><i>p</i></b> |
|----------------------------|-----------------|-----------------------|----------------------|----------|-----------------|
| Jaccard                    | Gut Region      | 5.021                 | 0.10766              | 5.7211   | <b>0.001</b>    |
|                            | Site            | 3.309                 | 0.07096              | 3.7708   | <b>0.001</b>    |
|                            | Sex             | 0.799                 | 0.01713              | 2.7304   | <b>0.001</b>    |
|                            | Age             | 0.647                 | 0.01388              | 2.2126   | <b>0.002</b>    |
| Bray-Curtis                | Gut Region      | 8.511                 | 0.17782              | 10.3656  | <b>0.001</b>    |
|                            | Site            | 3.272                 | 0.06837              | 3.9852   | <b>0.001</b>    |
|                            | Sex             | 0.793                 | 0.01658              | 2.8988   | <b>0.002</b>    |
|                            | Age             | 0.8                   | 0.01672              | 2.9242   | <b>0.002</b>    |
| Unweighted unfrac          | Gut Region      | 3.1658                | 0.20183              | 12.2717  | <b>0.001</b>    |
|                            | Site            | 1.167                 | 0.0744               | 4.5235   | <b>0.001</b>    |
|                            | Sex             | 0.2774                | 0.01769              | 3.2259   | <b>0.004</b>    |
|                            | Age             | 0.2402                | 0.01531              | 2.7934   | <b>0.003</b>    |
| Weighted unfrac            | Gut Region      | 5.6009                | 0.342                | 24.7671  | <b>0.001</b>    |
|                            | Site            | 0.7453                | 0.04551              | 3.2956   | <b>0.002</b>    |
|                            | Sex             | 0.1828                | 0.01116              | 2.4248   | 0.055           |
|                            | Age             | 0.3501                | 0.02138              | 4.644    | <b>0.002</b>    |

**Table S12:** PERMANOVA results for within species (*A. speciosus*) gut microbiota beta-diversity with all GIT regions included. Bold text indicates statistical significance.



**PERMANOVA gut regions included, *A. argenteus***

| <b>Dissimilarity Index</b> | <b>Variable</b> | <b>Sum of Squares</b> | <b>R<sup>2</sup></b> | <b>F</b> | <b><i>p</i></b> |
|----------------------------|-----------------|-----------------------|----------------------|----------|-----------------|
| Jaccard                    | Gut Region      | 1.737                 | 0.15734              | 2.0728   | <b>0.001</b>    |
|                            | Site            | 0.8825                | 0.07994              | 3.1595   | <b>0.001</b>    |
|                            | Sex             | 0.5989                | 0.05425              | 2.1442   | <b>0.002</b>    |
| Bray-Curtis                | Gut Region      | 2.3742                | 0.20174              | 2.8253   | <b>0.001</b>    |
|                            | Site            | 0.8956                | 0.0761               | 3.1972   | <b>0.001</b>    |
|                            | Sex             | 0.6556                | 0.0557               | 2.3403   | <b>0.006</b>    |
| Unweighted unifrac         | Gut Region      | 1.0521                | 0.29497              | 4.6851   | <b>0.001</b>    |
|                            | Site            | 0.2206                | 0.06186              | 2.9473   | <b>0.006</b>    |
|                            | Sex             | 0.1981                | 0.05554              | 2.6464   | <b>0.014</b>    |
| Weighted unifrac           | Gut Region      | 3.1108                | 0.47008              | 10.0174  | <b>0.001</b>    |
|                            | Site            | 0.4098                | 0.06193              | 3.9593   | <b>0.014</b>    |
|                            | Sex             | 0.1986                | 0.03001              | 1.9183   | 0.115           |

**Table S13:** PERMANOVA results for within species (*A. argenteus*) gut microbiota beta-diversity with all GIT regions included. Bold text indicates statistical significance.

**PERMANOVA gut regions included, *M. rufocanus***

| <b>Dissimilarity Index</b> | <b>Variable</b> | <b>Sum of Squares</b> | <b>R<sup>2</sup></b> | <b>F</b> | <b><i>p</i></b> |
|----------------------------|-----------------|-----------------------|----------------------|----------|-----------------|
| Jaccard                    | Gut Region      | 3.5                   | 0.08417              | 3.5317   | <b>0.001</b>    |
|                            | Site            | 4.086                 | 0.09826              | 4.1229   | <b>0.001</b>    |
|                            | Sex             | 0.621                 | 0.01493              | 1.8801   | <b>0.003</b>    |
|                            | Age             | 0.674                 | 0.0162               | 2.0394   | <b>0.001</b>    |
| Bray-Curtis                | Gut Region      | 4.629                 | 0.11182              | 5.0003   | <b>0.001</b>    |
|                            | Site            | 4.697                 | 0.11345              | 5.0732   | <b>0.001</b>    |
|                            | Sex             | 0.646                 | 0.01561              | 2.0943   | <b>0.001</b>    |
|                            | Age             | 0.874                 | 0.02112              | 2.8334   | <b>0.001</b>    |
| Unweighted unifrac         | Gut Region      | 3.2729                | 0.2294               | 11.5249  | <b>0.001</b>    |
|                            | Site            | 1.2335                | 0.08646              | 4.3436   | <b>0.001</b>    |
|                            | Sex             | 0.1512                | 0.0106               | 1.5972   | 0.071           |
|                            | Age             | 0.2382                | 0.0167               | 2.5167   | <b>0.007</b>    |
| Weighted unifrac           | Gut Region      | 3.5355                | 0.25814              | 12.9768  | <b>0.001</b>    |
|                            | Site            | 0.6179                | 0.04511              | 2.2678   | <b>0.026</b>    |
|                            | Sex             | 0.1099                | 0.00802              | 1.2096   | 0.266           |
|                            | Age             | 0.4423                | 0.03229              | 4.8702   | <b>0.006</b>    |

**Table S14:** PERMANOVA results for within species (*M. rufocanus*) gut microbiota beta-diversity with all GIT regions included. Bold text indicates statistical significance.

**Pairwise PERMANOVA among gut regions, *A. speciosus***

| Dissimilarity Index | Variable   | Cecum - Rectum          |                |         |              | Colon - Cecum           |                |         |              | Colon - Rectum           |                |         |              |
|---------------------|------------|-------------------------|----------------|---------|--------------|-------------------------|----------------|---------|--------------|--------------------------|----------------|---------|--------------|
|                     |            | Sum of Squares          | R <sup>2</sup> | F       | p            | Sum of Squares          | R <sup>2</sup> | F       | p            | Sum of Squares           | R <sup>2</sup> | F       | p            |
| Jaccard             | Gut Region | 0.1699                  | 0.01125        | 0.6435  | 0.983        | 0.2749                  | 0.01376        | 1.0176  | 0.413        | 0.3165                   | 0.01615        | 1.1588  | 0.129        |
|                     | Site       | 2.0954                  | 0.13866        | 2.6447  | <b>0.001</b> | 2.2219                  | 0.11127        | 2.7421  | <b>0.001</b> | 2.1915                   | 0.11184        | 2.6743  | <b>0.001</b> |
|                     | Sex        | 0.5117                  | 0.03386        | 1.9373  | <b>0.001</b> | 0.5082                  | 0.02545        | 1.8815  | <b>0.001</b> | 0.4807                   | 0.02453        | 1.7599  | <b>0.003</b> |
|                     | Age        | 0.4507                  | 0.02982        | 1.7063  | <b>0.005</b> | 0.4883                  | 0.02445        | 1.808   | <b>0.001</b> | 0.4903                   | 0.02502        | 1.7948  | <b>0.002</b> |
| Bray-Curtis         | Gut Region | 0.4834                  | 0.03205        | 1.879   | <b>0.005</b> | 0.5686                  | 0.02823        | 2.144   | <b>0.001</b> | 0.4786                   | 0.02377        | 1.7421  | <b>0.009</b> |
|                     | Site       | 1.8524                  | 0.1228         | 2.4001  | <b>0.001</b> | 2.1865                  | 0.10855        | 2.7482  | <b>0.001</b> | 2.2107                   | 0.10981        | 2.6826  | <b>0.001</b> |
|                     | Sex        | 0.5169                  | 0.03427        | 2.0093  | <b>0.005</b> | 0.5016                  | 0.0249         | 1.8913  | <b>0.005</b> | 0.5203                   | 0.02584        | 1.8939  | <b>0.006</b> |
|                     | Age        | 0.655                   | 0.04342        | 2.546   | <b>0.002</b> | 0.7085                  | 0.03517        | 2.6713  | <b>0.001</b> | 0.7159                   | 0.03556        | 2.6062  | <b>0.001</b> |
| Unweighted unifrac  | Gut Region | 0.0546                  | 0.01486        | 0.8597  | 0.68         | 0.0672                  | 0.01415        | 1.0655  | 0.357        | 0.0881                   | 0.01776        | 1.2976  | 0.102        |
|                     | Site       | 0.4848                  | 0.13187        | 2.5424  | <b>0.001</b> | 0.5333                  | 0.11224        | 2.8184  | <b>0.001</b> | 0.5635                   | 0.1136         | 2.7671  | <b>0.001</b> |
|                     | Sex        | 0.1265                  | 0.03441        | 1.9904  | <b>0.007</b> | 0.1377                  | 0.02898        | 2.1833  | <b>0.003</b> | 0.1387                   | 0.02796        | 2.043   | <b>0.002</b> |
|                     | Age        | 0.15                    | 0.0408         | 2.3599  | <b>0.003</b> | 0.1656                  | 0.03485        | 2.6254  | <b>0.002</b> | 0.165                    | 0.03326        | 2.4305  | <b>0.002</b> |
| Weighted unifrac    | Gut Region | 0.1996                  | 0.05713        | 3.6447  | <b>0.011</b> | 0.1469                  | 0.03054        | 2.4485  | <b>0.04</b>  | 0.2602                   | 0.05145        | 4.1045  | <b>0.006</b> |
|                     | Site       | 0.3712                  | 0.10626        | 2.2596  | <b>0.018</b> | 0.3991                  | 0.08295        | 2.217   | <b>0.013</b> | 0.465                    | 0.09195        | 2.4452  | <b>0.005</b> |
|                     | Sex        | 0.1282                  | 0.03671        | 2.342   | <b>0.047</b> | 0.1318                  | 0.02739        | 2.196   | 0.059        | 0.1691                   | 0.03344        | 2.6678  | <b>0.026</b> |
|                     | Age        | 0.3302                  | 0.09452        | 6.0301  | <b>0.001</b> | 0.4732                  | 0.09834        | 7.8853  | <b>0.001</b> | 0.4229                   | 0.08362        | 6.6707  | <b>0.001</b> |
| Dissimilarity Index | Variable   | Colon - Small Intestine |                |         |              | Small Intestine - Cecum |                |         |              | Small Intestine - Rectum |                |         |              |
|                     |            | Sum of Squares          | R <sup>2</sup> | F       | p            | Sum of Squares          | R <sup>2</sup> | F       | p            | Sum of Squares           | R <sup>2</sup> | F       | p            |
| Jaccard             | Gut Region | 3.2263                  | 0.10765        | 10.2769 | <b>0.001</b> | 2.7766                  | 0.11057        | 8.7412  | <b>0.001</b> | 2.4068                   | 0.09892        | 7.4833  | <b>0.001</b> |
|                     | Site       | 1.881                   | 0.06276        | 1.9972  | <b>0.001</b> | 1.741                   | 0.06933        | 1.827   | <b>0.001</b> | 1.7266                   | 0.07096        | 1.7894  | <b>0.001</b> |
|                     | Sex        | 0.5181                  | 0.01729        | 1.6504  | <b>0.009</b> | 0.528                   | 0.02102        | 1.6622  | <b>0.01</b>  | 0.5192                   | 0.02134        | 1.6143  | <b>0.008</b> |
|                     | Age        | 0.4845                  | 0.01617        | 1.5434  | <b>0.026</b> | 0.3723                  | 0.01482        | 1.172   | 0.139        | 0.3804                   | 0.01564        | 1.1828  | 0.114        |
| Bray-Curtis         | Gut Region | 5.2863                  | 0.17607        | 18.4936 | <b>0.001</b> | 4.9493                  | 0.20059        | 17.7443 | <b>0.001</b> | 4.1016                   | 0.17185        | 14.3382 | <b>0.001</b> |
|                     | Site       | 2.0776                  | 0.0692         | 2.4227  | <b>0.001</b> | 1.6124                  | 0.06535        | 1.9269  | <b>0.001</b> | 1.7401                   | 0.07291        | 2.0277  | <b>0.003</b> |
|                     | Sex        | 0.4588                  | 0.01528        | 1.6052  | 0.068        | 0.4413                  | 0.01789        | 1.5823  | 0.072        | 0.4688                   | 0.01964        | 1.6388  | 0.058        |
|                     | Age        | 0.4773                  | 0.0159         | 1.6698  | <b>0.05</b>  | 0.3769                  | 0.01528        | 1.3513  | 0.139        | 0.3925                   | 0.01645        | 1.372   | 0.125        |
| Unweighted unifrac  | Gut Region | 2.1938                  | 0.20393        | 22.9577 | <b>0.001</b> | 1.7389                  | 0.19544        | 17.7268 | <b>0.001</b> | 1.5892                   | 0.18596        | 16.0504 | <b>0.001</b> |
|                     | Site       | 0.8773                  | 0.08155        | 3.0601  | <b>0.001</b> | 0.7339                  | 0.08248        | 2.4938  | <b>0.002</b> | 0.6843                   | 0.08007        | 2.3037  | <b>0.001</b> |
|                     | Sex        | 0.2519                  | 0.02341        | 2.6359  | <b>0.014</b> | 0.2304                  | 0.02589        | 2.3483  | <b>0.023</b> | 0.2257                   | 0.02641        | 2.2796  | <b>0.024</b> |
|                     | Age        | 0.1724                  | 0.01602        | 1.8041  | <b>0.07</b>  | 0.1124                  | 0.01264        | 1.1462  | 0.293        | 0.1057                   | 0.01237        | 1.0678  | 0.357        |
| Weighted unifrac    | Gut Region | 3.2353                  | 0.30236        | 37.7693 | <b>0.001</b> | 3.2278                  | 0.35068        | 38.4697 | <b>0.001</b> | 3.455                    | 0.36075        | 39.0967 | <b>0.001</b> |
|                     | Site       | 0.6223                  | 0.05816        | 2.4216  | <b>0.007</b> | 0.4872                  | 0.05293        | 1.9354  | <b>0.033</b> | 0.5295                   | 0.05528        | 1.9972  | <b>0.038</b> |
|                     | Sex        | 0.1497                  | 0.01399        | 1.748   | 0.123        | 0.1982                  | 0.02154        | 2.3627  | 0.066        | 0.2001                   | 0.02089        | 2.2638  | 0.059        |
|                     | Age        | 0.1825                  | 0.01706        | 2.131   | 0.077        | 0.089                   | 0.00967        | 1.061   | 0.327        | 0.0905                   | 0.00945        | 1.0242  | 0.373        |

**Table S15:** Pairwise PERMANOVA results for within species (*A. speciosus*) gut microbiota beta-diversity. Bold text indicates statistical significance.

**Pairwise PERMANOVA among gut regions, *A. argenteus***

| Dissimilarity Index | Variable   | Cecum - Rectum          |                |         |              | Colon - Cecum           |                |         |              | Colon - Rectum           |                |         |              |
|---------------------|------------|-------------------------|----------------|---------|--------------|-------------------------|----------------|---------|--------------|--------------------------|----------------|---------|--------------|
|                     |            | Sum of Squares          | R <sup>2</sup> | F       | p            | Sum of Squares          | R <sup>2</sup> | F       | p            | Sum of Squares           | R <sup>2</sup> | F       | p            |
| Jaccard             | Gut Region | 0.0922                  | 0.02049        | 0.3875  | 0.986        | 0.1474                  | 0.03588        | 0.5968  | 0.894        | 0.1114                   | 0.02683        | 0.4397  | 0.984        |
|                     | Site       | 0.6567                  | 0.14596        | 2.7608  | <b>0.001</b> | 0.5944                  | 0.14466        | 2.4061  | <b>0.001</b> | 0.603                    | 0.14518        | 2.3791  | <b>0.001</b> |
|                     | Sex        | 0.4203                  | 0.09341        | 1.7668  | <b>0.01</b>  | 0.4028                  | 0.09802        | 1.6304  | <b>0.022</b> | 0.3977                   | 0.09574        | 1.5689  | <b>0.04</b>  |
| Bray-Curtis         | Gut Region | 0.1461                  | 0.0308         | 0.5764  | 0.878        | 0.1406                  | 0.03317        | 0.5432  | 0.912        | 0.131                    | 0.0293         | 0.4851  | 0.947        |
|                     | Site       | 0.6613                  | 0.13944        | 2.6097  | <b>0.004</b> | 0.5645                  | 0.13314        | 2.1808  | <b>0.008</b> | 0.6637                   | 0.14842        | 2.4572  | <b>0.001</b> |
|                     | Sex        | 0.3875                  | 0.0817         | 1.5289  | 0.094        | 0.4285                  | 0.10107        | 1.6555  | 0.061        | 0.4357                   | 0.09744        | 1.6131  | 0.059        |
| Unweighted unfrac   | Gut Region | 0.02864                 | 0.02698        | 0.5118  | 0.936        | 0.0444                  | 0.046          | 0.7767  | 0.709        | 0.02653                  | 0.02806        | 0.4579  | 0.973        |
|                     | Site       | 0.15127                 | 0.14254        | 2.7037  | <b>0.003</b> | 0.13992                 | 0.14495        | 2.4473  | <b>0.003</b> | 0.1376                   | 0.14552        | 2.3749  | <b>0.001</b> |
|                     | Sex        | 0.09809                 | 0.09243        | 1.7533  | 0.035        | 0.09491                 | 0.09833        | 1.6602  | 0.055        | 0.08618                  | 0.09114        | 1.4875  | 0.11         |
| Weighted unfrac     | Gut Region | 0.1019                  | 0.07118        | 1.5253  | 0.172        | 0.08783                 | 0.05638        | 1.0206  | 0.387        | 0.10634                  | 0.06438        | 1.3562  | 0.213        |
|                     | Site       | 0.32197                 | 0.22491        | 4.8194  | <b>0.001</b> | 0.31455                 | 0.2019         | 3.655   | <b>0.007</b> | 0.4726                   | 0.28612        | 6.0277  | <b>0.002</b> |
|                     | Sex        | 0.07241                 | 0.05058        | 1.0839  | 0.364        | 0.12286                 | 0.07886        | 1.4276  | 0.199        | 0.13194                  | 0.07988        | 1.6828  | 0.141        |
| Dissimilarity Index | Variable   | Colon - Small Intestine |                |         |              | Small Intestine - Cecum |                |         |              | Small Intestine - Rectum |                |         |              |
|                     |            | Sum of Squares          | R <sup>2</sup> | F       | p            | Sum of Squares          | R <sup>2</sup> | F       | p            | Sum of Squares           | R <sup>2</sup> | F       | p            |
| Jaccard             | Gut Region | 0.9049                  | 0.15698        | 2.7296  | <b>0.001</b> | 1.1474                  | 0.17836        | 3.6504  | <b>0.001</b> | 1.0643                   | 0.16777        | 3.4144  | <b>0.001</b> |
|                     | Site       | 0.4479                  | 0.07769        | 1.351   | 0.072        | 0.4819                  | 0.07491        | 1.5331  | <b>0.049</b> | 0.4847                   | 0.0764         | 1.5548  | <b>0.039</b> |
|                     | Sex        | 0.4336                  | 0.07522        | 1.3079  | 0.103        | 0.4032                  | 0.06269        | 1.283   | 0.121        | 0.4309                   | 0.06793        | 1.3824  | 0.078        |
| Bray-Curtis         | Gut Region | 1.277                   | 0.21026        | 3.9726  | <b>0.001</b> | 1.5953                  | 0.24005        | 5.283   | <b>0.001</b> | 1.3492                   | 0.20287        | 4.3108  | <b>0.001</b> |
|                     | Site       | 0.5194                  | 0.08552        | 1.6157  | 0.058        | 0.4569                  | 0.06875        | 1.513   | 0.087        | 0.4976                   | 0.07482        | 1.5897  | <b>0.07</b>  |
|                     | Sex        | 0.4196                  | 0.06909        | 1.3053  | 0.169        | 0.3658                  | 0.05505        | 1.2115  | 0.237        | 0.4219                   | 0.06344        | 1.348   | 0.156        |
| Unweighted unfrac   | Gut Region | 0.56323                 | 0.28141        | 5.838   | <b>0.001</b> | 0.75253                 | 0.32092        | 8.177   | <b>0.001</b> | 0.74469                  | 0.32155        | 8.4404  | <b>0.001</b> |
|                     | Site       | 0.09295                 | 0.04644        | 0.9635  | 0.385        | 0.12238                 | 0.05219        | 1.3298  | 0.208        | 0.14274                  | 0.06163        | 1.6178  | 0.104        |
|                     | Sex        | 0.18757                 | 0.09372        | 1.9442  | <b>0.049</b> | 0.18161                 | 0.07745        | 1.9734  | 0.063        | 0.19331                  | 0.08347        | 2.191   | <b>0.046</b> |
| Weighted unfrac     | Gut Region | 1.5613                  | 0.41869        | 10.6232 | <b>0.001</b> | 1.9941                  | 0.50749        | 16.7913 | <b>0.001</b> | 2.225                    | 0.52283        | 18.3957 | <b>0.001</b> |
|                     | Site       | 0.2119                  | 0.05683        | 1.442   | 0.191        | 0.1108                  | 0.0282         | 0.9331  | 0.379        | 0.1655                   | 0.0389         | 1.3686  | 0.225        |
|                     | Sex        | 0.1921                  | 0.05153        | 1.3073  | 0.237        | 0.1618                  | 0.04118        | 1.3626  | 0.226        | 0.1718                   | 0.04038        | 1.4207  | 0.208        |

**Table S16:** Pairwise PERMANOVA results for within species (*A. argenteus*) gut microbiota beta-diversity. Bold text indicates statistical significance.

## Pairwise PERMANOVA among gut regions, *M. rufocanus*

| Dissimilarity Index | Variable   | Cecum - Rectum          |                |         |              | Colon - Cecum           |                |         |              | Colon - Rectum           |                |         |              |
|---------------------|------------|-------------------------|----------------|---------|--------------|-------------------------|----------------|---------|--------------|--------------------------|----------------|---------|--------------|
|                     |            | Sum of Squares          | R <sup>2</sup> | F       | p            | Sum of Squares          | R <sup>2</sup> | F       | p            | Sum of Squares           | R <sup>2</sup> | F       | p            |
| Jaccard             | Gut Region | 0.1941                  | 0.01999        | 0.707   | 0.916        | 0.2469                  | 0.01409        | 0.8036  | 0.928        | 0.2572                   | 0.01419        | 0.8193  | 0.912        |
|                     | Site       | 2.4425                  | 0.2515         | 2.9648  | <b>0.001</b> | 2.5426                  | 0.14508        | 2.7583  | <b>0.001</b> | 2.5503                   | 0.14069        | 2.7078  | <b>0.001</b> |
|                     | Sex        | 0.531                   | 0.05467        | 1.9335  | <b>0.004</b> | 0.4544                  | 0.02593        | 1.4788  | <b>0.015</b> | 0.4456                   | 0.02458        | 1.4194  | <b>0.019</b> |
|                     | Age        | 0.5027                  | 0.05176        | 1.8307  | <b>0.002</b> | 0.4545                  | 0.02594        | 1.4793  | <b>0.011</b> | 0.4321                   | 0.02384        | 1.3765  | <b>0.026</b> |
| Bray-Curtis         | Gut Region | 0.1664                  | 0.01804        | 0.7026  | 0.873        | 0.2305                  | 0.01362        | 0.8015  | 0.856        | 0.267                    | 0.01527        | 0.9144  | 0.643        |
|                     | Site       | 2.7607                  | 0.29933        | 3.885   | <b>0.001</b> | 2.8832                  | 0.17041        | 3.3419  | <b>0.001</b> | 2.9234                   | 0.16723        | 3.3377  | <b>0.001</b> |
|                     | Sex        | 0.5524                  | 0.0599         | 2.3324  | <b>0.002</b> | 0.4099                  | 0.02423        | 1.4253  | <b>0.031</b> | 0.4159                   | 0.02379        | 1.4244  | <b>0.04</b>  |
|                     | Age        | 0.5322                  | 0.0577         | 2.2468  | <b>0.003</b> | 0.4547                  | 0.02688        | 1.5813  | <b>0.022</b> | 0.4452                   | 0.02547        | 1.525   | <b>0.022</b> |
| Unweighted unfrac   | Gut Region | 0.06482                 | 0.02881        | 1.119   | 0.292        | 0.0879                  | 0.02213        | 1.3233  | 0.096        | 0.0666                   | 0.01614        | 0.9697  | 0.476        |
|                     | Site       | 0.68059                 | 0.30254        | 3.9162  | <b>0.001</b> | 0.6834                  | 0.17202        | 3.4292  | <b>0.001</b> | 0.6886                   | 0.16698        | 3.3437  | <b>0.001</b> |
|                     | Sex        | 0.11133                 | 0.04949        | 1.9219  | <b>0.008</b> | 0.0872                  | 0.02196        | 1.3132  | 0.099        | 0.091                    | 0.02206        | 1.3254  | 0.078        |
|                     | Age        | 0.11839                 | 0.05263        | 2.0437  | <b>0.003</b> | 0.125                   | 0.03148        | 1.8825  | <b>0.009</b> | 0.12                     | 0.02909        | 1.7478  | <b>0.013</b> |
| Weighted unfrac     | Gut Region | 0.04721                 | 0.04381        | 1.7634  | 0.089        | 0.08447                 | 0.03909        | 2.2624  | <b>0.041</b> | 0.0878                   | 0.03967        | 2.3492  | <b>0.041</b> |
|                     | Site       | 0.26678                 | 0.24756        | 3.3216  | <b>0.001</b> | 0.23425                 | 0.10841        | 2.0913  | <b>0.004</b> | 0.22869                  | 0.10334        | 2.0397  | <b>0.014</b> |
|                     | Sex        | 0.08093                 | 0.0751         | 3.023   | <b>0.004</b> | 0.05941                 | 0.02749        | 1.5911  | 0.112        | 0.07802                  | 0.03526        | 2.0876  | 0.063        |
|                     | Age        | 0.09371                 | 0.08696        | 3.5004  | <b>0.003</b> | 0.10243                 | 0.0474         | 2.7433  | <b>0.015</b> | 0.09925                  | 0.04485        | 2.6557  | <b>0.019</b> |
| Dissimilarity Index | Variable   | Colon - Small Intestine |                |         |              | Small Intestine - Cecum |                |         |              | Small Intestine - Rectum |                |         |              |
|                     |            | Sum of Squares          | R <sup>2</sup> | F       | p            | Sum of Squares          | R <sup>2</sup> | F       | p            | Sum of Squares           | R <sup>2</sup> | F       | p            |
| Jaccard             | Gut Region | 2.3792                  | 0.0768         | 6.8205  | <b>0.001</b> | 1.4535                  | 0.06693        | 4.0903  | <b>0.001</b> | 1.3684                   | 0.0616         | 3.8015  | <b>0.001</b> |
|                     | Site       | 2.563                   | 0.08274        | 2.4492  | <b>0.001</b> | 2.3521                  | 0.10832        | 2.2064  | <b>0.001</b> | 2.3327                   | 0.10501        | 2.1601  | <b>0.001</b> |
|                     | Sex        | 0.4127                  | 0.01332        | 1.1831  | 0.13         | 0.3657                  | 0.01684        | 1.0291  | 0.347        | 0.3844                   | 0.0173         | 1.0679  | 0.257        |
|                     | Age        | 0.5075                  | 0.01638        | 1.4548  | <b>0.018</b> | 0.4868                  | 0.02242        | 1.3699  | <b>0.027</b> | 0.4903                   | 0.02207        | 1.3619  | <b>0.025</b> |
| Bray-Curtis         | Gut Region | 3.2344                  | 0.10469        | 9.7927  | <b>0.001</b> | 1.9177                  | 0.08953        | 5.7594  | <b>0.001</b> | 1.9786                   | 0.08974        | 5.8709  | <b>0.001</b> |
|                     | Site       | 2.7804                  | 0.09           | 2.8061  | <b>0.001</b> | 2.4535                  | 0.11455        | 2.4562  | <b>0.001</b> | 2.4501                   | 0.11112        | 2.4233  | <b>0.001</b> |
|                     | Sex        | 0.4024                  | 0.01302        | 1.2182  | 0.143        | 0.3547                  | 0.01656        | 1.0653  | 0.33         | 0.3737                   | 0.01695        | 1.109   | 0.279        |
|                     | Age        | 0.6967                  | 0.02255        | 2.1095  | <b>0.001</b> | 0.7103                  | 0.03316        | 2.1331  | <b>0.002</b> | 0.7319                   | 0.03319        | 2.1715  | <b>0.002</b> |
| Unweighted unfrac   | Gut Region | 2.4149                  | 0.22128        | 23.4817 | <b>0.001</b> | 1.4157                  | 0.17379        | 12.0178 | <b>0.001</b> | 1.3607                   | 0.16447        | 11.2724 | <b>0.001</b> |
|                     | Site       | 0.8109                  | 0.0743         | 2.6283  | <b>0.001</b> | 0.803                   | 0.09858        | 2.2722  | <b>0.003</b> | 0.7393                   | 0.08936        | 2.0414  | <b>0.002</b> |
|                     | Sex        | 0.1067                  | 0.00978        | 1.038   | 0.318        | 0.0911                  | 0.01119        | 0.7738  | 0.648        | 0.0882                   | 0.01067        | 0.731   | 0.732        |
|                     | Age        | 0.1761                  | 0.01614        | 1.7125  | 0.062        | 0.1817                  | 0.02231        | 1.5426  | 0.094        | 0.1701                   | 0.02056        | 1.4092  | 0.144        |
| Weighted unfrac     | Gut Region | 2.5543                  | 0.21908        | 22.953  | <b>0.001</b> | 1.5439                  | 0.16104        | 10.7244 | <b>0.001</b> | 1.5094                   | 0.15706        | 10.6542 | <b>0.001</b> |
|                     | Site       | 0.656                   | 0.05626        | 1.9649  | 0.055        | 0.5964                  | 0.06221        | 1.381   | 0.177        | 0.6114                   | 0.06362        | 1.4385  | 0.159        |
|                     | Sex        | 0.0712                  | 0.00611        | 0.6398  | 0.596        | 0.0655                  | 0.00683        | 0.4551  | 0.787        | 0.0704                   | 0.00732        | 0.4969  | 0.756        |
|                     | Age        | 0.3652                  | 0.03132        | 3.2819  | <b>0.029</b> | 0.4708                  | 0.04911        | 3.2702  | <b>0.024</b> | 0.4775                   | 0.04968        | 3.3701  | <b>0.023</b> |

**Table S17:** Pairwise PERMANOVA results for within species (*M. rufocanus*) gut microbiota beta-diversity. Bold text indicates statistical significance.

**PERMANOVA among host species, all species included**

| Dissimilarity Index | Variable | Rectum         |                |         |              | Colon           |                |         |              |
|---------------------|----------|----------------|----------------|---------|--------------|-----------------|----------------|---------|--------------|
|                     |          | Sum of squares | R <sup>2</sup> | F       | p            | Sum of squares  | R <sup>2</sup> | F       | p            |
| Jaccard             | Species  | 4.1466         | 0.22154        | 6.7272  | <b>0.001</b> | 7.588           | 0.22193        | 12.1555 | <b>0.001</b> |
|                     | Site     | 1.3082         | 0.0699         | 1.4149  | <b>0.027</b> | 1.593           | 0.0466         | 1.7016  | <b>0.003</b> |
|                     | Sex      | 0.3179         | 0.01699        | 1.0316  | 0.287        | 0.312           | 0.00912        | 0.9994  | 0.324        |
|                     | Age      | 0.3081         | 0.01646        | 0.9996  | 0.36         | 0.352           | 0.01031        | 1.1291  | 0.222        |
| Bray-Curtis         | Species  | 4.386          | 0.23187        | 7.1296  | <b>0.001</b> | 7.967           | 0.23028        | 12.8502 | <b>0.001</b> |
|                     | Site     | 1.2794         | 0.06764        | 1.3865  | <b>0.025</b> | 1.718           | 0.04966        | 1.8474  | <b>0.002</b> |
|                     | Sex      | 0.3038         | 0.01606        | 0.9877  | 0.411        | 0.318           | 0.0092         | 1.0268  | 0.349        |
|                     | Age      | 0.3349         | 0.01771        | 1.0889  | 0.262        | 0.414           | 0.01198        | 1.3367  | 0.112        |
| Unweighted unfrac   | Species  | 1.811          | 0.3439         | 12.5438 | <b>0.001</b> | 3.4537          | 0.36371        | 24.7898 | <b>0.001</b> |
|                     | Site     | 0.3408         | 0.06472        | 1.5738  | <b>0.033</b> | 0.4477          | 0.04714        | 2.1421  | <b>0.005</b> |
|                     | Sex      | 0.084          | 0.01596        | 1.1641  | 0.238        | 0.0633          | 0.00666        | 0.9085  | 0.43         |
|                     | Age      | 0.0706         | 0.01341        | 0.9779  | 0.355        | 0.0978          | 0.0103         | 1.4034  | 0.148        |
| Weighted unfrac     | Species  | 0.9121         | 0.23594        | 7.1953  | <b>0.001</b> | 1.5127          | 0.21585        | 11.5832 | <b>0.001</b> |
|                     | Site     | 0.2055         | 0.05316        | 1.0807  | 0.336        | 0.256           | 0.03652        | 1.3066  | 0.156        |
|                     | Sex      | 0.0851         | 0.022          | 1.342   | 0.192        | 0.0706          | 0.01007        | 1.0811  | 0.361        |
|                     | Age      | 0.0645         | 0.01668        | 1.017   | 0.418        | 0.0756          | 0.01079        | 1.1578  | 0.286        |
| Dissimilarity Index | Variable | Cecum          |                |         |              | Small Intestine |                |         |              |
|                     |          | Sum of squares | R <sup>2</sup> | F       | p            | Sum of squares  | R <sup>2</sup> | F       | p            |
| Jaccard             | Species  | 4.2995         | 0.2308         | 7.2481  | <b>0.001</b> | 6.148           | 0.1553         | 8.3689  | <b>0.001</b> |
|                     | Site     | 1.2947         | 0.0695         | 1.4551  | <b>0.013</b> | 1.81            | 0.04572        | 1.6426  | <b>0.001</b> |
|                     | Sex      | 0.2894         | 0.01553        | 0.9756  | 0.391        | 0.367           | 0.00927        | 0.9988  | 0.353        |
|                     | Age      | 0.2879         | 0.01546        | 0.9708  | 0.354        | 0.41            | 0.01035        | 1.1158  | 0.199        |
| Bray-Curtis         | Species  | 4.9895         | 0.26674        | 8.7541  | <b>0.001</b> | 8.045           | 0.20842        | 11.9986 | <b>0.001</b> |
|                     | Site     | 1.1855         | 0.06338        | 1.3867  | <b>0.028</b> | 1.582           | 0.04098        | 1.5728  | <b>0.012</b> |
|                     | Sex      | 0.2238         | 0.01196        | 0.7852  | 0.796        | 0.335           | 0.00869        | 1.0001  | 0.43         |
|                     | Age      | 0.3375         | 0.01804        | 1.1842  | 0.197        | 0.477           | 0.01235        | 1.4216  | 0.093        |
| Unweighted unfrac   | Species  | 1.8215         | 0.34797        | 13.0457 | <b>0.001</b> | 2.7611          | 0.17991        | 10.4283 | <b>0.001</b> |
|                     | Site     | 0.3476         | 0.06641        | 1.6598  | <b>0.023</b> | 1.2569          | 0.0819         | 3.1646  | <b>0.001</b> |
|                     | Sex      | 0.0605         | 0.01156        | 0.867   | 0.505        | 0.0839          | 0.00546        | 0.6335  | 0.83         |
|                     | Age      | 0.0729         | 0.01392        | 1.0441  | 0.302        | 0.1249          | 0.00814        | 0.9434  | 0.489        |
| Weighted unfrac     | Species  | 0.8903         | 0.24793        | 7.7369  | <b>0.001</b> | 3.6992          | 0.21817        | 12.5477 | <b>0.001</b> |
|                     | Site     | 0.1711         | 0.04765        | 0.9913  | 0.464        | 0.5485          | 0.03235        | 1.2403  | 0.251        |
|                     | Sex      | 0.0297         | 0.00827        | 0.516   | 0.857        | 0.0864          | 0.0051         | 0.5864  | 0.695        |
|                     | Age      | 0.0833         | 0.0232         | 1.4479  | 0.155        | 0.2398          | 0.01414        | 1.6266  | 0.14         |

**Table S18:** PERMANOVA results comparing gut regions among species, all species included. Bold text indicates statistical significance.

**Pairwise PERMANOVA between *A. speciosus* and *M. rufocanus***

| Dissimilarity Index | Variable | Rectum         |                |         |              | Colon           |                |         |              |
|---------------------|----------|----------------|----------------|---------|--------------|-----------------|----------------|---------|--------------|
|                     |          | Sum of squares | R <sup>2</sup> | F       | p            | Sum of squares  | R <sup>2</sup> | F       | p            |
| Jaccard             | Species  | 3.1497         | 0.20371        | 10.0046 | <b>0.001</b> | 6.5373          | 0.20839        | 20.8669 | <b>0.001</b> |
|                     | Site     | 1.3012         | 0.08416        | 1.3777  | <b>0.036</b> | 1.6034          | 0.05111        | 1.706   | <b>0.002</b> |
|                     | Sex      | 0.3155         | 0.02041        | 1.0022  | 0.347        | 0.3157          | 0.01006        | 1.0076  | 0.349        |
|                     | Age      | 0.3057         | 0.01977        | 0.9709  | 0.432        | 0.3575          | 0.0114         | 1.141   | 0.208        |
| Bray-Curtis         | Species  | 3.357          | 0.21663        | 10.8262 | <b>0.001</b> | 6.8858          | 0.21806        | 22.3311 | <b>0.001</b> |
|                     | Site     | 1.2777         | 0.08246        | 1.3736  | 0.051        | 1.7597          | 0.05573        | 1.9023  | <b>0.002</b> |
|                     | Sex      | 0.2964         | 0.01913        | 0.9558  | 0.451        | 0.3103          | 0.00983        | 1.0065  | 0.335        |
|                     | Age      | 0.3324         | 0.02145        | 1.0719  | 0.261        | 0.421           | 0.01333        | 1.3654  | 0.112        |
| Unweighted unifrac  | Species  | 1.4584         | 0.33571        | 20.2105 | <b>0.001</b> | 2.9769          | 0.32936        | 39.5733 | <b>0.001</b> |
|                     | Site     | 0.3535         | 0.08137        | 1.6328  | <b>0.035</b> | 0.4531          | 0.05013        | 2.0077  | <b>0.012</b> |
|                     | Sex      | 0.0774         | 0.01783        | 1.0732  | 0.313        | 0.0789          | 0.00873        | 1.0489  | 0.295        |
|                     | Age      | 0.0736         | 0.01695        | 1.0203  | 0.335        | 0.1134          | 0.01254        | 1.5068  | 0.115        |
| Weighted unifrac    | Species  | 0.69639        | 0.2371         | 12.1151 | <b>0.001</b> | 1.2944          | 0.21858        | 21.7946 | <b>0.001</b> |
|                     | Site     | 0.23924        | 0.08146        | 1.3874  | 0.134        | 0.2423          | 0.04092        | 1.3599  | 0.14         |
|                     | Sex      | 0.04199        | 0.0143         | 0.7305  | 0.595        | 0.0276          | 0.00466        | 0.4642  | 0.881        |
|                     | Age      | 0.06257        | 0.0213         | 1.0886  | 0.348        | 0.0813          | 0.01373        | 1.3695  | 0.203        |
| Dissimilarity Index | Variable | Cecum          |                |         |              | Small Intestine |                |         |              |
|                     |          | Sum of squares | R <sup>2</sup> | F       | p            | Sum of squares  | R <sup>2</sup> | F       | p            |
| Jaccard             | Species  | 3.3089         | 0.21426        | 10.9643 | <b>0.001</b> | 4.95            | 0.14003        | 13.5642 | <b>0.001</b> |
|                     | Site     | 1.2758         | 0.08261        | 1.4092  | <b>0.023</b> | 1.84            | 0.05206        | 1.6809  | <b>0.001</b> |
|                     | Sex      | 0.3062         | 0.01983        | 1.0145  | 0.335        | 0.415           | 0.01173        | 1.1363  | 0.175        |
|                     | Age      | 0.2915         | 0.01888        | 0.9661  | 0.397        | 0.409           | 0.01158        | 1.1218  | 0.186        |
| Bray-Curtis         | Species  | 3.6814         | 0.24221        | 12.8325 | <b>0.001</b> | 6.535           | 0.19063        | 19.7864 | <b>0.001</b> |
|                     | Site     | 1.1799         | 0.07763        | 1.3709  | 0.07         | 1.829           | 0.05336        | 1.8461  | <b>0.002</b> |
|                     | Sex      | 0.2409         | 0.01585        | 0.8397  | 0.647        | 0.341           | 0.00995        | 1.0325  | 0.345        |
|                     | Age      | 0.3433         | 0.02258        | 1.1966  | 0.178        | 0.474           | 0.01384        | 1.4365  | 0.093        |
| Unweighted unifrac  | Species  | 1.4552         | 0.33364        | 20.5476 | <b>0.001</b> | 2.3594          | 0.17321        | 18.5568 | <b>0.001</b> |
|                     | Site     | 0.3451         | 0.07911        | 1.6241  | <b>0.037</b> | 1.3134          | 0.09643        | 3.4434  | <b>0.001</b> |
|                     | Sex      | 0.0665         | 0.01526        | 0.9396  | 0.401        | 0.1645          | 0.01208        | 1.2937  | 0.202        |
|                     | Age      | 0.0869         | 0.01992        | 1.2268  | 0.204        | 0.1209          | 0.00888        | 0.951   | 0.419        |
| Weighted unifrac    | Species  | 0.61768        | 0.23025        | 11.7861 | <b>0.001</b> | 2.5086          | 0.17325        | 17.2415 | <b>0.001</b> |
|                     | Site     | 0.15268        | 0.05691        | 0.9711  | 0.491        | 0.6107          | 0.04218        | 1.3991  | 0.151        |
|                     | Sex      | 0.03135        | 0.01169        | 0.5982  | 0.751        | 0.0762          | 0.00527        | 0.524   | 0.758        |
|                     | Age      | 0.09912        | 0.03695        | 1.8913  | 0.076        | 0.226           | 0.01561        | 1.5531  | 0.153        |

**Table S19:** Pairwise PERMANOVA results comparing gut regions between *A. speciosus* and *M. rufocanus*. Bold text indicates statistical significance.

### Pairwise PERMANOVA between *A. speciosus* and *A. argenteus*

| Dissimilarity Index | Variable | Rectum         |                |        |              | Colon           |                |        |              |
|---------------------|----------|----------------|----------------|--------|--------------|-----------------|----------------|--------|--------------|
|                     |          | Sum of squares | R <sup>2</sup> | F      | p            | Sum of squares  | R <sup>2</sup> | F      | p            |
| Jaccard             | Species  | 0.7782         | 0.07587        | 2.7271 | <b>0.001</b> | 0.7655          | 0.05248        | 2.661  | <b>0.001</b> |
|                     | Site     | 1.1868         | 0.11571        | 1.3864 | <b>0.001</b> | 1.3609          | 0.09331        | 1.5769 | <b>0.001</b> |
|                     | Sex      | 0.2901         | 0.02828        | 1.0166 | 0.381        | 0.3077          | 0.0211         | 1.0698 | 0.216        |
|                     | Age      | 0.2974         | 0.02899        | 1.0422 | 0.329        | 0.3568          | 0.02446        | 1.2402 | <b>0.042</b> |
| Bray-Curtis         | Species  | 0.816          | 0.07714        | 2.735  | <b>0.001</b> | 0.8344          | 0.05535        | 2.8639 | <b>0.001</b> |
|                     | Site     | 1.0608         | 0.10028        | 1.1851 | 0.095        | 1.4731          | 0.09772        | 1.6854 | <b>0.001</b> |
|                     | Sex      | 0.282          | 0.02666        | 0.9451 | 0.574        | 0.3313          | 0.02198        | 1.1373 | 0.245        |
|                     | Age      | 0.3632         | 0.03433        | 1.2172 | 0.153        | 0.49            | 0.0325         | 1.6817 | <b>0.014</b> |
| Unweighted unfrac   | Species  | 0.18585        | 0.07569        | 2.7162 | <b>0.001</b> | 0.2388          | 0.06516        | 3.4343 | <b>0.001</b> |
|                     | Site     | 0.26102        | 0.1063         | 1.2716 | <b>0.027</b> | 0.3698          | 0.10091        | 1.7728 | <b>0.001</b> |
|                     | Sex      | 0.07048        | 0.0287         | 1.0301 | 0.418        | 0.0796          | 0.02172        | 1.145  | 0.2          |
|                     | Age      | 0.09076        | 0.03696        | 1.3264 | 0.075        | 0.1257          | 0.03431        | 1.8081 | <b>0.005</b> |
| Weighted unfrac     | Species  | 0.10315        | 0.04071        | 1.4155 | 0.194        | 0.1422          | 0.03478        | 1.8977 | 0.098        |
|                     | Site     | 0.22207        | 0.08765        | 1.0158 | 0.422        | 0.3285          | 0.08039        | 1.4619 | 0.128        |
|                     | Sex      | 0.13933        | 0.055          | 1.912  | 0.085        | 0.201           | 0.04917        | 2.6828 | <b>0.028</b> |
|                     | Age      | 0.10138        | 0.04002        | 1.3913 | 0.182        | 0.344           | 0.08418        | 4.5928 | <b>0.005</b> |
| Dissimilarity Index | Variable | Cecum          |                |        |              | Small Intestine |                |        |              |
|                     |          | Sum of squares | R <sup>2</sup> | F      | p            | Sum of squares  | R <sup>2</sup> | F      | p            |
| Jaccard             | Species  | 0.7785         | 0.0732         | 2.7953 | <b>0.001</b> | 0.7782          | 0.07587        | 2.7271 | <b>0.001</b> |
|                     | Site     | 1.2264         | 0.11532        | 1.4678 | <b>0.001</b> | 1.1868          | 0.11571        | 1.3864 | <b>0.001</b> |
|                     | Sex      | 0.2949         | 0.02773        | 1.059  | 0.275        | 0.2901          | 0.02828        | 1.0166 | 0.381        |
|                     | Age      | 0.2581         | 0.02427        | 0.9268 | 0.687        | 0.2974          | 0.02899        | 1.0422 | 0.329        |
| Bray-Curtis         | Species  | 1.2237         | 0.11463        | 4.5261 | <b>0.001</b> | 0.816           | 0.07714        | 2.735  | <b>0.001</b> |
|                     | Site     | 1.0294         | 0.09644        | 1.2692 | <b>0.048</b> | 1.0608          | 0.10028        | 1.1851 | 0.095        |
|                     | Sex      | 0.2152         | 0.02016        | 0.7961 | 0.832        | 0.282           | 0.02666        | 0.9451 | 0.574        |
|                     | Age      | 0.3658         | 0.03427        | 1.3531 | 0.099        | 0.3632          | 0.03433        | 1.2172 | 0.153        |
| Unweighted unfrac   | Species  | 0.20173        | 0.08141        | 3.1259 | <b>0.001</b> | 0.18585         | 0.07569        | 2.7162 | <b>0.001</b> |
|                     | Site     | 0.2635         | 0.10634        | 1.361  | <b>0.005</b> | 0.26102         | 0.1063         | 1.2716 | <b>0.027</b> |
|                     | Sex      | 0.07092        | 0.02862        | 1.0989 | 0.282        | 0.07048         | 0.0287         | 1.0301 | 0.418        |
|                     | Age      | 0.0704         | 0.02841        | 1.0909 | 0.326        | 0.09076         | 0.03696        | 1.3264 | 0.075        |
| Weighted unfrac     | Species  | 0.23371        | 0.09595        | 3.7704 | <b>0.003</b> | 0.10315         | 0.04071        | 1.4155 | 0.194        |
|                     | Site     | 0.20773        | 0.08529        | 1.1171 | 0.3          | 0.22207         | 0.08765        | 1.0158 | 0.422        |
|                     | Sex      | 0.04129        | 0.01695        | 0.6661 | 0.68         | 0.13933         | 0.055          | 1.912  | 0.085        |
|                     | Age      | 0.15533        | 0.06377        | 2.5058 | <b>0.04</b>  | 0.10138         | 0.04002        | 1.3913 | 0.182        |

**Table S20:** Pairwise PERMANOVA results comparing gut regions between *A. speciosus* and *A. argenteus*. Bold text indicates statistical significance.



### Pairwise PERMANOVA between *A. argenteus* and *M. rufocanus*

| Dissimilarity Index | Variable | Rectum         |                |         |              | Colon           |                |         |              |
|---------------------|----------|----------------|----------------|---------|--------------|-----------------|----------------|---------|--------------|
|                     |          | Sum of squares | R <sup>2</sup> | F       | p            | Sum of squares  | R <sup>2</sup> | F       | p            |
| Jaccard             | Species  | 2.134          | 0.22679        | 7.0295  | <b>0.001</b> | 2.1993          | 0.13112        | 6.7826  | <b>0.001</b> |
|                     | Site     | 1.453          | 0.15442        | 1.5955  | <b>0.009</b> | 1.6035          | 0.0956         | 1.6484  | <b>0.001</b> |
|                     | Sex      | 0.3226         | 0.03428        | 1.0625  | 0.275        | 0.3091          | 0.01843        | 0.9531  | 0.517        |
|                     | Age      | 0.3392         | 0.03605        | 1.1172  | 0.208        | 0.3401          | 0.02027        | 1.0488  | 0.308        |
| Bray-Curtis         | Species  | 2.1719         | 0.23115        | 7.3834  | <b>0.001</b> | 2.2328          | 0.13488        | 7.098   | <b>0.001</b> |
|                     | Site     | 1.5346         | 0.16332        | 1.7389  | <b>0.001</b> | 1.7422          | 0.10525        | 1.8462  | <b>0.001</b> |
|                     | Sex      | 0.3198         | 0.03403        | 1.0871  | 0.26         | 0.2932          | 0.01771        | 0.9322  | 0.556        |
|                     | Age      | 0.3692         | 0.03929        | 1.2552  | 0.145        | 0.3319          | 0.02005        | 1.0552  | 0.304        |
| Unweighted unfrac   | Species  | 0.96079        | 0.34494        | 12.9127 | <b>0.001</b> | 1.0477          | 0.24827        | 15.1989 | <b>0.001</b> |
|                     | Site     | 0.39258        | 0.14094        | 1.7587  | <b>0.025</b> | 0.4091          | 0.09694        | 1.9782  | <b>0.006</b> |
|                     | Sex      | 0.08852        | 0.03178        | 1.1896  | 0.228        | 0.0627          | 0.01485        | 0.9092  | 0.502        |
|                     | Age      | 0.07858        | 0.02821        | 1.0561  | 0.31         | 0.0811          | 0.01923        | 1.1772  | 0.228        |
| Weighted unfrac     | Species  | 0.56929        | 0.3133         | 11.7362 | <b>0.001</b> | 0.46014         | 0.15965        | 8.8899  | <b>0.001</b> |
|                     | Site     | 0.26719        | 0.14704        | 1.8361  | <b>0.034</b> | 0.31747         | 0.11015        | 2.0445  | <b>0.018</b> |
|                     | Sex      | 0.04746        | 0.02612        | 0.9784  | 0.401        | 0.0359          | 0.01246        | 0.6936  | 0.669        |
|                     | Age      | 0.10852        | 0.05972        | 2.2372  | <b>0.044</b> | 0.10174         | 0.0353         | 1.9657  | 0.071        |
| Dissimilarity Index | Variable | Cecum          |                |         |              | Small Intestine |                |         |              |
|                     |          | Sum of squares | R <sup>2</sup> | F       | p            | Sum of squares  | R <sup>2</sup> | F       | p            |
| Jaccard             | Species  | 2.1867         | 0.24652        | 7.5102  | <b>0.001</b> | 1.8038          | 0.0873         | 4.8339  | <b>0.001</b> |
|                     | Site     | 1.4027         | 0.15813        | 1.6058  | <b>0.015</b> | 1.9785          | 0.09576        | 1.7674  | <b>0.001</b> |
|                     | Sex      | 0.2921         | 0.03293        | 1.0033  | 0.346        | 0.3675          | 0.01779        | 0.9848  | 0.452        |
|                     | Age      | 0.3303         | 0.03724        | 1.1345  | 0.237        | 0.4659          | 0.02255        | 1.2486  | 0.076        |
| Bray-Curtis         | Species  | 2.3726         | 0.26921        | 8.4506  | <b>0.001</b> | 2.1944          | 0.10802        | 6.2356  | <b>0.001</b> |
|                     | Site     | 1.3737         | 0.15586        | 1.6309  | <b>0.024</b> | 1.928           | 0.0949         | 1.8262  | <b>0.001</b> |
|                     | Sex      | 0.258          | 0.02928        | 0.9191  | 0.476        | 0.3143          | 0.01547        | 0.8931  | 0.603        |
|                     | Age      | 0.3168         | 0.03595        | 1.1285  | 0.259        | 0.7461          | 0.03672        | 2.12    | <b>0.002</b> |
| Unweighted unfrac   | Species  | 0.96941        | 0.37484        | 14.7491 | <b>0.001</b> | 0.8717          | 0.12151        | 6.905   | <b>0.001</b> |
|                     | Site     | 0.42496        | 0.16432        | 2.1552  | <b>0.009</b> | 0.6244          | 0.08704        | 1.6487  | <b>0.011</b> |
|                     | Sex      | 0.05945        | 0.02299        | 0.9046  | 0.425        | 0.1134          | 0.01581        | 0.8987  | 0.522        |
|                     | Age      | 0.08078        | 0.03123        | 1.229   | 0.248        | 0.1359          | 0.01894        | 1.0762  | 0.329        |
| Weighted unfrac     | Species  | 0.45296        | 0.28928        | 8.8961  | <b>0.001</b> | 1.8437          | 0.17247        | 10.5428 | <b>0.001</b> |
|                     | Site     | 0.1951         | 0.1246         | 1.2772  | 0.196        | 0.6754          | 0.06318        | 1.2873  | 0.239        |
|                     | Sex      | 0.03483        | 0.02225        | 0.6841  | 0.685        | 0.1019          | 0.00953        | 0.5828  | 0.651        |
|                     | Age      | 0.06826        | 0.04359        | 1.3405  | 0.22         | 0.5494          | 0.0514         | 3.1419  | <b>0.024</b> |

**Table S21:** Pairwise PERMANOVA results comparing gut regions between *A. argenteus* and *M. rufocanus*. Bold text indicates statistical significance.

**Number of more abundant genera per gut region (All GIT regions included, LefSe)**

| Species             | Rectum | Colon | Cecum | Small     | Average |
|---------------------|--------|-------|-------|-----------|---------|
|                     |        |       |       | Intestine |         |
| <i>A. speciosus</i> | 1      | 0     | 0     | 0         | 0.25    |
| <i>A. argenteus</i> | 17     | 4     | 11    | 4         | 9.75    |
| <i>M. rufocanus</i> | 0      | 0     | 1     | 0         | 0.25    |
| <b>Average</b>      | 6      | 1.67  | 4.67  | 1.33      |         |

**Table S22:** Number of more abundant genera found in each gut region based on LefSe analysis when all regions were included.

**Number of more abundant genera per gut region (pairwise LefSe)**

| Species             | CE - SI |    | RC - SI |    | CL - SI |       | CE - CL |      | CE - RC |      | RC - CL |      |
|---------------------|---------|----|---------|----|---------|-------|---------|------|---------|------|---------|------|
|                     | CE      | SI | RC      | SI | CL      | SI    | CE      | CL   | CE      | RC   | RC      | CL   |
| <i>A. speciosus</i> | 47      | 23 | 44      | 19 | 47      | 22    | 4       | 4    | 5       | 5    | 7       | 5    |
| <i>A. argenteus</i> | 39      | 10 | 35      | 7  | 33      | 8     | 1       | 0    | 2       | 2    | 1       | 0    |
| <i>M. rufocanus</i> | 48      | 9  | 53      | 10 | 50      | 20    | 6       | 0    | 1       | 3    | 12      | 0    |
| <b>Average</b>      | 44.67   | 14 | 44      | 12 | 43.33   | 16.67 | 3.67    | 1.33 | 2.67    | 3.33 | 6.67    | 1.67 |

**Table S23:** Number of more abundant genera found in each gut region based on pairwise LefSe analysis we SI is small intestine, CE is cecum, CL is colon, and RC is the rectum.

| Within species all gut regions included |                 |      |                         |      |                     |      |                                  |      |
|-----------------------------------------|-----------------|------|-------------------------|------|---------------------|------|----------------------------------|------|
| Species                                 | Small intestine |      | Cecum                   |      | Colon               |      | Rectum                           |      |
|                                         | Genus           | LDA  | Genus                   | LDA  | Genus               | LDA  | Genus                            | LDA  |
| A. speciosus                            | —               | —    | —                       | —    | —                   | —    | Ruminococcaceae NK4A214          | 4.32 |
|                                         | Lactobacillus   | 4.76 | Campylobacter           | 4.60 | Ruminiclostridium 9 | 3.91 | Alistipes                        | 4.54 |
|                                         | Streptococcus   | 4.33 | Treponema 2             | 4.59 | Ruminiclostridium   | 3.84 | Lachnospiraceae NK4A136          | 4.34 |
|                                         | Rodentibacter   | 4.25 | Lachnospiraceae UCG_010 | 3.86 | Intestinimonas      | 3.24 | Bacteroides                      | 4.43 |
|                                         | Veillonella     | 3.48 | Oscillibacter           | 3.94 | Oxalobacter         | 3.45 | Rikenellaceae RC9                | 4.33 |
|                                         |                 |      | Odoribacter             | 3.64 |                     |      | Prevotellaceae UCG_003           | 4.11 |
|                                         |                 |      | Desulfovibrio           | 3.38 |                     |      | Rikenella                        | 3.95 |
|                                         |                 |      | Roseburia               | 3.18 |                     |      | Prevotellaceae Ga6A1             | 3.76 |
|                                         |                 |      | Ruminococcaceae UCG_004 | 3.36 |                     |      | Ruminiclostridium 6              | 3.59 |
| A. argenteus                            |                 |      | Tyzzereella             | 3.09 |                     |      | Butyricoccus                     | 3.12 |
|                                         |                 |      | Ruminiclostridium 5     | 3.11 |                     |      | Ruminococcaceae UCG_010          | 3.19 |
|                                         |                 |      | Acetatifactor           | 3.01 |                     |      | Ruminococcaceae UCG_014          | 3.17 |
|                                         |                 |      |                         |      |                     |      | Muribaculum                      | 3.17 |
|                                         |                 |      |                         |      |                     |      | Eubacterium coprostanoligenes    | 3.10 |
|                                         |                 |      |                         |      |                     |      | Prevotellaceae UCG_001           | 3.11 |
|                                         |                 |      |                         |      |                     |      | Ruminococcaceae NK4A214          | 3.15 |
|                                         |                 |      |                         |      |                     |      | Lachnospiraceae UCG_006          | 3.12 |
|                                         |                 |      |                         |      |                     |      | Lachnospiraceae<br>GCA_900066575 | 2.96 |
| M. rufocanus                            | —               | —    | Treponema 2             | 4.52 | —                   | —    | —                                | —    |

**Table S24:** LEfSe results showing more abundant genera within each gut region when all gut regions were included for *A. speciosus*, *A. argenteus* and *M. rufocanus*. LDA scores shown.

| Within species ( <i>A. speciosus</i> ) pairwise between the upper and lower GIT |      |                                   |      |                         |      |                                   |      |
|---------------------------------------------------------------------------------|------|-----------------------------------|------|-------------------------|------|-----------------------------------|------|
| Small Intestine - Colon                                                         |      |                                   |      | Small Intestine - Cecum |      |                                   |      |
| Small Intestine                                                                 |      | Colon                             |      | Small Intestine         |      | Cecum                             |      |
| Genus                                                                           | LDA  | Genus                             | LDA  | Genus                   | LDA  | Genus                             | LDA  |
| Tyzzereella 3                                                                   | 5.31 | Helicobacter                      | 4.63 | Tyzzereella 3           | 5.30 | Helicobacter                      | 4.62 |
| Escherichia-Shigella                                                            | 4.58 | Alistipes                         | 4.42 | Escherichia-Shigella    | 4.58 | Alistipes                         | 4.33 |
| Ureaplasma                                                                      | 4.37 | Lachnospiraceae NK4A136           | 4.28 | Ureaplasma              | 4.44 | Oscillibacter                     | 4.27 |
| Lactobacillus                                                                   | 4.00 | Rickenellaceae RC9                | 4.17 | Lactobacillus           | 4.00 | Bacteroides                       | 4.26 |
|                                                                                 |      |                                   |      |                         |      | Lachnospiraceae                   |      |
| Streptococcus                                                                   | 3.74 | Bacteroides                       | 4.11 | Streptococcus           | 3.92 | NK4A136                           | 4.18 |
|                                                                                 |      |                                   |      |                         |      | Prevotellaceae                    |      |
| Turicibacter                                                                    | 3.60 | Oscillibacter                     | 3.96 | Delftia                 | 3.63 | UCG_003                           | 4.13 |
| Rodentibacter                                                                   | 3.30 | Prevotellaceae Ga6A1              | 3.81 | Enterococcus            | 3.56 | Ruminiclostridium 9               | 4.07 |
| Chthoniobacterales                                                              | 3.26 | Ruminiclostridium 9               | 3.75 | Turicibacter            | 3.55 | Treponema 2                       | 3.99 |
| Veillonella                                                                     | 3.21 | Treponema 2                       | 3.73 | Gemella                 | 3.43 | Mucispirillum                     | 3.95 |
| Enterococcus                                                                    | 3.09 | Ruminiclostridium                 | 3.68 | Rodentibacter           | 3.37 | Rikenellaceae RC9 gut             | 3.87 |
| Delftia                                                                         | 3.07 | Odoribacter                       | 3.59 | Veillonella             | 3.24 | Ruminiclostridium                 | 3.84 |
| Acinetobacter                                                                   | 2.69 | Ruminiclostridium 6               | 3.52 | Stenotrophomonas        | 3.15 | Prevotellaceae Ga6A1              | 3.83 |
|                                                                                 |      | Eubacterium,<br>coprostanoligenes |      |                         |      |                                   |      |
| Pseudomonas                                                                     | 2.61 |                                   | 3.50 | Bergeyella              | 3.14 | Odoribacter                       | 3.51 |
|                                                                                 |      |                                   |      |                         |      | Lachnospiraceae                   |      |
| Exiguobacterium                                                                 | 2.61 | Intestinimonas                    | 3.27 | Providencia             | 2.99 | FCS020                            | 3.47 |
| Fusobacterium                                                                   | 2.61 | Eubacterium, oxidoreducens        | 3.26 | Carnobacterium          | 2.87 | Intestinimonas                    | 3.46 |
| Bergeyella                                                                      | 2.59 | Roseburia                         | 3.23 | Acinetobacter           | 2.86 | Ruminiclostridium 6               | 3.43 |
| Leptotrichia                                                                    | 2.54 | Prevotellaceae UCG_001            | 3.10 | Leptotrichia            | 2.78 | Muribaculum                       | 3.24 |
|                                                                                 |      |                                   |      |                         |      | Prevotellaceae                    |      |
| Providencia                                                                     | 2.53 | Ruminococcaceae UCG_014           | 3.10 | Serratia                | 2.78 | UCG_001                           | 3.20 |
| Staphylococcus                                                                  | 2.46 | Acetatifactor                     | 3.09 | Staphylococcus          | 2.75 | Butyrivibrio                      | 3.18 |
|                                                                                 |      |                                   |      |                         |      | Eubacterium                       |      |
| Carnobacterium                                                                  | 2.44 | Muribaculum                       | 2.98 | Enterorhabdus           | 2.73 | coprostanoligenes                 | 3.18 |
|                                                                                 |      | Lachnospiraceae,<br>GCA_900066575 |      |                         |      |                                   |      |
| Stenotrophomonas                                                                | 2.37 |                                   | 2.97 | Pseudomonas             | 2.73 | Candidatus Soleiferrea            | 3.17 |
|                                                                                 |      |                                   |      |                         |      | Ruminococcaceae                   |      |
| Serratia                                                                        | 2.34 | Tyzzereella                       | 2.97 | Fusobacterium           | 2.64 | UCG_014                           | 3.12 |
|                                                                                 |      | Lachnospiraceae FCS020            | 2.93 | Corynebacterium 1       | 2.60 | Rikenella                         | 3.09 |
|                                                                                 |      | Butyrivibrio                      | 2.88 |                         |      | Roseburia                         | 3.08 |
|                                                                                 |      |                                   |      |                         |      | Lachnospiraceae                   |      |
|                                                                                 |      | Rikenella                         | 2.86 |                         |      | UCG_010                           | 3.03 |
|                                                                                 |      | Gastranaerophilales               | 2.83 |                         |      | Oxalobacter                       | 3.02 |
|                                                                                 |      | Ruminococcaceae UCG_010           | 2.77 |                         |      | Eubacterium nodatum               | 3.00 |
|                                                                                 |      | Blautia                           | 2.70 |                         |      | Gastranaerophilales               | 2.98 |
|                                                                                 |      | Eubacterium brachy                | 2.67 |                         |      | Tyzzereella                       | 2.98 |
|                                                                                 |      | Oxalobacter                       | 2.66 |                         |      | Acetatifactor                     | 2.93 |
|                                                                                 |      |                                   |      |                         |      | Lachnospiraceae,<br>GCA_900066575 |      |
|                                                                                 |      | Lachnospiraceae NC2004            | 2.64 |                         |      | Candidatus                        | 2.87 |
|                                                                                 |      | Lachnospiraceae UCG_006           | 2.54 |                         |      | Saccharimonas                     | 2.84 |
|                                                                                 |      |                                   |      |                         |      | Ruminococcaceae                   |      |
|                                                                                 |      | Lachnoclostridium                 | 2.52 |                         |      | UCG_010                           | 2.83 |
|                                                                                 |      |                                   |      |                         |      | Ruminococcaceae                   |      |
|                                                                                 |      | Parabacteroides                   | 2.51 |                         |      | NK4A214                           | 2.81 |
|                                                                                 |      |                                   |      |                         |      | Ruminococcaceae                   |      |
|                                                                                 |      | Desulfovibrio                     | 2.48 |                         |      | UCG_004                           | 2.80 |
|                                                                                 |      | Ruminococcus 1                    | 2.45 |                         |      | Bilophila                         | 2.71 |
|                                                                                 |      | Butyricoccus                      | 2.44 |                         |      | Parabacteroides                   | 2.71 |
|                                                                                 |      |                                   |      |                         |      | Ruminococcaceae                   |      |
|                                                                                 |      | Lachnospiraceae UCG_010           | 2.43 |                         |      | UCG_009                           | 2.71 |
|                                                                                 |      | Ruminococcaceae NK4A214           | 2.42 |                         |      | Desulfovibrio                     | 2.68 |
|                                                                                 |      | Candidatus Saccharimonas          | 2.39 |                         |      | Lachnoclostridium                 | 2.67 |
|                                                                                 |      |                                   |      |                         |      | Lachnospiraceae                   |      |
|                                                                                 |      | Eubacterium nodatum               | 2.38 |                         |      | UCG_006                           | 2.66 |
|                                                                                 |      |                                   |      |                         |      | Lachnospiraceae                   |      |
|                                                                                 |      | Ruminococcaceae UCG_004           | 2.36 |                         |      | NC2004                            | 2.66 |
|                                                                                 |      | Bilophila                         | 2.35 |                         |      | Ruminococcus 1                    | 2.66 |
|                                                                                 |      | Ruminococcaceae UCG_002           | 2.35 |                         |      | Peptococcus                       | 2.66 |
|                                                                                 |      |                                   |      |                         |      | Ruminococcaceae                   |      |
|                                                                                 |      | Ruminococcaceae UCG_009           | 2.28 |                         |      | UCG_002                           | 2.62 |
|                                                                                 |      |                                   |      |                         |      |                                   |      |
|                                                                                 |      | Cerasiococcus                     | 2.20 |                         |      | Blautia                           | 2.58 |
|                                                                                 |      | Peptococcus                       | 2.15 |                         |      | Butyricoccus                      | 2.52 |

**Table S25:** More abundant bacterial genera as compared between the upper and lower GIT in *A. speciosus* based on pairwise LefSe analysis. LDA scores shown.

| Within species ( <i>A. speciosus</i> ) pairwise between the upper and lower GIT |      |                          |      |
|---------------------------------------------------------------------------------|------|--------------------------|------|
| Small Intestine - Rectum                                                        |      |                          |      |
| Small Intestine                                                                 |      | Rectum                   |      |
| Genus                                                                           | LDA  | Genus                    | LDA  |
| Tyzzereella 3                                                                   | 5.30 | Alistipes                | 4.44 |
| Ureaplasma                                                                      | 4.39 | Bacteroides              | 4.38 |
| Lactobacillus                                                                   | 3.94 | Lachnospiraceae NK4A136  | 4.36 |
| Turicibacter                                                                    | 3.55 | Helicobacter             | 4.27 |
| Rodentibacter                                                                   | 3.31 | Prevotellaceae UCG_003   | 4.15 |
| Veillonella                                                                     | 3.24 | Rikenellaceae RC9        | 4.13 |
| Delftia                                                                         | 3.23 | Prevotellaceae Ga6A1     | 3.97 |
| Enterococcus                                                                    | 3.06 | Oscillibacter            | 3.88 |
| Providencia                                                                     | 2.91 | Treponema 2              | 3.87 |
| Camobacterium                                                                   | 2.71 | Mucispirillum            | 3.77 |
| Acinetobacter                                                                   | 2.62 | Ruminiclostridium 9      | 3.77 |
| Serratia                                                                        | 2.61 | Ruminiclostridium        | 3.68 |
| Leptotrichia                                                                    | 2.60 | Ruminiclostridium 6      | 3.68 |
| Fusobacterium                                                                   | 2.59 | Odoribacter              | 3.53 |
| Pseudomonas                                                                     | 2.56 | Rikenella                | 3.49 |
| Bergeyella                                                                      | 2.54 | Butyrivibrio             | 3.47 |
| Corynebacterium 1                                                               | 2.50 | Prevotellaceae UCG_001   | 3.38 |
| Staphylococcus                                                                  | 2.45 | Muribaculum              | 3.31 |
| Stenotrophomonas                                                                | 2.40 | Intestinimonas           | 3.30 |
|                                                                                 |      | Eubacterium              |      |
|                                                                                 |      | coprostanoligenes        | 3.25 |
|                                                                                 |      | Candidatus Saccharimonas | 3.15 |
|                                                                                 |      | Roseburia                | 3.02 |
|                                                                                 |      | Lachnospiraceae UCG_010  | 2.81 |
|                                                                                 |      | Lachnospiraceae,         |      |
|                                                                                 |      | GCA_900066575            | 2.79 |
|                                                                                 |      | Candidatus Soleaferrea   | 2.78 |
|                                                                                 |      | Tyzzereella              | 2.77 |
|                                                                                 |      | Parabacteroides          | 2.73 |
|                                                                                 |      | Peptococcus              | 2.71 |
|                                                                                 |      | Acetatifactor            | 2.69 |
|                                                                                 |      | Ruminococcaceae NK4A214  | 2.69 |
|                                                                                 |      | Eubacterium nodatum      | 2.69 |
|                                                                                 |      | Ruminococcus 1           | 2.66 |
|                                                                                 |      | Lachnoclostridium        | 2.64 |
|                                                                                 |      | Lachnospiraceae NC2004   | 2.58 |
|                                                                                 |      | Desulfovibrio            | 2.56 |
|                                                                                 |      | Ruminococcaceae UCG_002  | 2.55 |
|                                                                                 |      | Ruminococcaceae UCG_009  | 2.53 |
|                                                                                 |      | Lachnospiraceae UCG_006  | 2.53 |
|                                                                                 |      | Ruminococcaceae UCG_004  | 2.51 |
|                                                                                 |      | Bilophila                | 2.46 |
|                                                                                 |      | Butyricoccus             | 2.46 |
|                                                                                 |      | Blautia                  | 2.44 |
|                                                                                 |      | Oxalobacter              | 2.39 |

**Table S25 (continued):** More abundant bacterial genera as compared between the upper and lower GIT in *A. speciosus* based on pairwise LEfSe analysis. LDA scores shown.

| Within species ( <i>A. speciosus</i> ) pairwise of the lower GIT |      |                            |      |                   |      |                            |      |                            |      |                            |      |
|------------------------------------------------------------------|------|----------------------------|------|-------------------|------|----------------------------|------|----------------------------|------|----------------------------|------|
| Cecum - Rectum                                                   |      |                            |      | Colon - Cecum     |      |                            |      | Colon - Rectum             |      |                            |      |
| Cecum                                                            |      | Rectum                     |      | Colon             |      | Cecum                      |      | Colon                      |      | Rectum                     |      |
| Genus                                                            | LDA  | Genus                      | LDA  | Genus             | LDA  | Genus                      | LDA  | Genus                      | LDA  | Genus                      | LDA  |
| Helicobacter                                                     | 4.35 | Streptococcus              | 3.93 | Lactobacillus     | 3.76 | Oscillibacter              | 3.97 | Helicobacter               | 4.32 | Rikenella                  | 3.35 |
| Oscillibacter                                                    | 4.09 | Gemella                    | 3.18 | Streptococcus     | 3.53 | Ruminiclostridium 9        | 3.78 | Tyzzereella 3              | 3.87 | Prevotellaceae UCG_001     | 3.07 |
| Ruminiclostridium 9                                              | 3.80 | Ruminococcaceae<br>NK4A214 | 2.29 | Gemella           | 2.58 | Prevotellaceae<br>UCG_001  | 3.00 | Acetatifactor              | 2.87 | Muribaculum                | 3.05 |
| Ruminiclostridium                                                | 3.42 | Ruminococcus               | 2.28 | Corynebacterium 1 | 2.08 | Ruminococcaceae<br>NK4A214 | 2.05 | Lachnospiraceae<br>UCG_010 | 2.60 | Candidatus Saccharimonas   | 3.02 |
| Lachnoclostridium                                                | 2.18 | Enterorhabdus              | 2.18 |                   |      |                            |      | Cerasicoccus               | 2.32 | Parasutterella             | 2.99 |
|                                                                  |      |                            |      |                   |      |                            |      |                            |      | Ruminococcaceae<br>NK4A214 | 2.67 |
|                                                                  |      |                            |      |                   |      |                            |      |                            |      | Ruminococcaceae<br>UCG_002 | 2.53 |

**Table S26:** More abundant bacterial genera as compared between the different regions of the lower GIT in *A. speciosus* based on pairwise LEfSe analysis. LDA scores shown.

Within species (*A. argenteus*) pairwise between the upper and lower GIT

| Small Intestine - Colon        |      |               |      | Small Intestine - Cecum |      |                          |      |
|--------------------------------|------|---------------|------|-------------------------|------|--------------------------|------|
| Small Intestine                |      | Colon         |      | Small Intestine         |      | Cecum                    |      |
| Genus                          | LDA  | Genus         | LDA  | Genus                   | LDA  | Genus                    | LDA  |
| Roseburia                      | 3.06 | Lactobacillus | 4.69 | Mycoplasma              | 5.05 | Treponema 2              | 4.66 |
| Tyzzellerella                  | 3.07 | Streptococcus | 4.33 | Lactobacillus           | 4.83 | Campylobacter            | 4.61 |
| Lachnospiraceae, GCA_900066575 | 3.12 | Rodentibacter | 4.28 | Streptococcus           | 4.34 | Alistipes                | 4.47 |
| Ruminiclostridium 6            | 3.13 | Pseudomonas   | 3.91 | Rodentibacter           | 4.27 | Bacteroides              | 4.25 |
| Intestinimonas                 | 3.26 | Coxiella      | 3.90 | Veillonella             | 3.48 | Rikenellaceae RC9        | 4.20 |
| Eubacterium coprostanoligenes  | 3.26 | Gemella       | 3.64 | Leptotrichia            | 3.27 | Prevotellaceae UCG_003   | 4.13 |
| Parasutterella                 | 3.32 | Veillonella   | 3.54 | Bifidobacterium         | 3.16 | Lachnospiraceae NK4A136  | 4.06 |
| Prevotellaceae UCG_001         | 3.35 | Leptotrichia  | 3.36 | Coxiella                | 3.13 | Oscillibacter            | 3.92 |
| Muribaculum                    | 3.38 |               |      | Pseudomonas             | 3.09 | Ruminiclostridium 9      | 3.75 |
| Ruminococcaceae NK4A214        | 3.45 |               |      | Gemella                 | 2.90 | Prevotellaceae Ga6A1     | 3.71 |
| Ruminococcaceae UCG_010        | 3.47 |               |      |                         |      | Odoribacter              | 3.67 |
| Ruminiclostridium 5            | 3.48 |               |      |                         |      | Rikenella                | 3.66 |
| Oxalobacter                    | 3.50 |               |      |                         |      | Ruminiclostridium 6      | 3.51 |
| Odoribacter                    | 3.52 |               |      |                         |      | Ruminiclostridium        | 3.48 |
| Prevotellaceae Ga6A1           | 3.56 |               |      |                         |      | Eubacterium nodatum      | 3.34 |
| Rikenella                      | 3.67 |               |      |                         |      | Lachnospiraceae UCG_010  | 3.33 |
| Ruminococcaceae UCG_004        | 3.70 |               |      |                         |      | Ruminococcaceae UCG_004  | 3.27 |
| Acetatifactor                  | 3.76 |               |      |                         |      | Oxalobacter              | 3.24 |
| Ruminococcaceae UCG_014        | 3.76 |               |      |                         |      | Roseburia                | 3.21 |
| Ruminiclostridium              | 3.80 |               |      |                         |      | Blautia                  | 3.21 |
| Ruminococcaceae UCG_009        | 3.84 |               |      |                         |      | Butyricoccus             | 3.19 |
| Ruminiclostridium 9            | 3.87 |               |      |                         |      | Ruminococcaceae UCG_010  | 3.14 |
| Oscillibacter                  | 3.88 |               |      |                         |      | Acetatifactor            | 3.11 |
| Prevotellaceae UCG_003         | 3.95 |               |      |                         |      | Desulfovibrio            | 3.09 |
| Bacteroides                    | 3.98 |               |      |                         |      | Lachnospiraceae          | 3.04 |
|                                |      |               |      |                         |      | Eubacterium              |      |
| Treponema 2                    | 4.01 |               |      |                         |      | coprostanoligenes        | 3.00 |
| Butyricoccus                   | 4.03 |               |      |                         |      | Tyzzellerella            | 3.00 |
| Eubacterium nodatum            | 4.05 |               |      |                         |      | Intestinimonas           | 3.00 |
| Rikenellaceae RC9              | 4.07 |               |      |                         |      | Muribaculum              | 2.99 |
| Lachnospiraceae NK4A136        | 4.20 |               |      |                         |      | Ruminiclostridium 5      | 2.98 |
| Campylobacter                  | 4.38 |               |      |                         |      | Prevotellaceae UCG_001   | 2.95 |
| Alistipes                      | 4.51 |               |      |                         |      | Ruminococcaceae NK4A214  | 2.94 |
|                                |      |               |      |                         |      | Parasutterella           | 2.92 |
|                                |      |               |      |                         |      | Ruminococcaceae UCG_014  | 2.92 |
|                                |      |               |      |                         |      | Candidatus Saccharimonas | 2.91 |
|                                |      |               |      |                         |      | Bilophila                | 2.90 |
|                                |      |               |      |                         |      | Lachnospiraceae,         |      |
|                                |      |               |      |                         |      | GCA_900066575            | 2.83 |
|                                |      |               |      |                         |      | Lachnospiraceae UCG_006  | 2.83 |
|                                |      |               |      |                         |      | Ruminococcus 1           | 2.81 |

**Table S27:** More abundant bacterial genera as compared between the upper and lower GIT in *A. argenteus* based on pairwise LEfSe analysis. LDA scores shown.

| Within species ( <i>A. argenteus</i> ) pairwise between the upper and lower GIT |      |                                |      |
|---------------------------------------------------------------------------------|------|--------------------------------|------|
| Small Intestine - Rectum                                                        |      |                                |      |
| Small Intestine                                                                 |      | Rectum                         |      |
| Genus                                                                           | LDA  | Genus                          | LDA  |
| Lactobacillus                                                                   | 4.76 | Alistipes                      | 4.54 |
| Streptococcus                                                                   | 4.27 | Bacteroides                    | 4.35 |
| Veillonella                                                                     | 3.52 | Lachnospiraceae NK4A136        | 4.30 |
| Coxiella                                                                        | 3.36 | Rikenellaceae RC9              | 4.30 |
| Pseudomonas                                                                     | 3.34 | Campylobacter                  | 4.29 |
| Leptotrichia                                                                    | 3.32 | Treponema 2                    | 4.22 |
| Gemella                                                                         | 2.99 | Prevotellaceae UCG_003         | 4.11 |
|                                                                                 |      | Rikenella                      | 3.87 |
|                                                                                 |      | Prevotellaceae Ga6A1           | 3.79 |
|                                                                                 |      | Oscillibacter                  | 3.72 |
|                                                                                 |      | Lachnospiraceae UCG_010        | 3.68 |
|                                                                                 |      | Ruminiclostridium 6            | 3.57 |
|                                                                                 |      | Ruminiclostridium 9            | 3.54 |
|                                                                                 |      | Eubacterium nodatum            | 3.53 |
|                                                                                 |      | Ruminiclostridium              | 3.51 |
|                                                                                 |      | Coriobacteriaceae UCG_002      | 3.51 |
|                                                                                 |      | Odoribacter                    | 3.46 |
|                                                                                 |      | Desulfovibrio                  | 3.20 |
|                                                                                 |      | Muribaculum                    | 3.20 |
|                                                                                 |      | Ruminococcaceae UCG_004        | 3.17 |
|                                                                                 |      | Eubacterium coprostanoligenes  | 3.15 |
|                                                                                 |      | Acetatifactor                  | 3.15 |
|                                                                                 |      | Ruminococcaceae UCG_014        | 3.14 |
|                                                                                 |      | Oxalobacter                    | 3.13 |
|                                                                                 |      | Prevotellaceae UCG_001         | 3.10 |
|                                                                                 |      | Roseburia                      | 3.05 |
|                                                                                 |      | Intestinimonas                 | 3.05 |
|                                                                                 |      | Candidatus Saccharimonas       | 3.05 |
|                                                                                 |      | Ruminococcaceae NK4A214        | 3.04 |
|                                                                                 |      | Ruminiclostridium 5            | 2.97 |
|                                                                                 |      | Lachnospiraceae, GCA_900066575 | 2.92 |
|                                                                                 |      | Butyricoccus                   | 2.92 |
|                                                                                 |      | Ruminococcaceae UCG_010        | 2.86 |
|                                                                                 |      | Tyzzereella                    | 2.80 |
|                                                                                 |      | Lachnospiraceae UCG_006        | 2.72 |

**Table S27 (continued):** More abundant bacterial genera as compared between the upper and lower GIT in *A. argenteus* based on pairwise LEfSe analysis. LDA scores shown.



| Within species ( <i>A. argenteus</i> ) pairwise of the lower GIT |      |               |      |               |     |               |      |                |     |               |      |
|------------------------------------------------------------------|------|---------------|------|---------------|-----|---------------|------|----------------|-----|---------------|------|
| Cecum - Rectum                                                   |      |               |      | Colon - Cecum |     |               |      | Colon - Rectum |     |               |      |
| Cecum                                                            |      | Rectum        |      | Colon         |     | Cecum         |      | Colon          |     | Rectum        |      |
| Genus                                                            | LDA  | Genus         | LDA  | Genus         | LDA | Genus         | LDA  | Genus          | LDA | Genus         | LDA  |
| Campylobacter                                                    | 4.31 | Rodentibacter | 3.89 | —             | —   | Desulfovibrio | 2.54 | —              | —   | Rodentibacter | 3.89 |

**Table S28:** More abundant bacterial genera as compared between the different regions of the lower GIT in *A. argenteus* based on pairwise LEfSe analysis. LDA scores shown.

| Within species ( <i>M. rufocanus</i> ) pairwise between the upper and lower GIT |       |                           |                 |                         |      |                             |      |
|---------------------------------------------------------------------------------|-------|---------------------------|-----------------|-------------------------|------|-----------------------------|------|
| Small Intestine - Colon                                                         |       |                           |                 | Small Intestine - Cecum |      |                             |      |
| Small Intestine                                                                 | Colon |                           | Small Intestine | Cecum                   |      |                             |      |
| Genus                                                                           | LDA   | Genus                     | LDA             | Genus                   | LDA  | Genus                       | LDA  |
| Ureaplasma                                                                      | 4.69  | Lachnospiraceae NK4A136   | 4.33            | Ureaplasma              | 4.67 | Treponema 2                 | 4.49 |
| Lactobacillus                                                                   | 4.46  | Eubacterium oxidoreducens | 4.32            | Lactobacillus           | 4.43 | Lachnospiraceae NK4A136     | 4.13 |
| Helicobacter                                                                    | 4.03  | Alistipes                 | 4.15            | Helicobacter            | 3.94 | Ruminiclostridium           | 4.08 |
| Rickettsia                                                                      | 3.99  | Treponema 2               | 4.14            | Desulfovibrio           | 3.87 | Alistipes                   | 4.05 |
| Rodentibacter                                                                   | 3.84  | Ruminiclostridium         | 4.00            | Escherichia-Shigella    | 3.34 | Oscillibacter               | 3.93 |
| Desulfovibrio                                                                   | 3.83  | Anaerovorax               | 3.79            | Veillonella             | 3.28 | Ruminiclostridium 9         | 3.71 |
| Enterococcus                                                                    | 3.81  | Ruminiclostridium 9       | 3.72            | Streptococcus           | 2.76 | Odoribacter                 | 3.69 |
| Exiguobacterium                                                                 | 3.72  | Odoribacter               | 3.71            | Coxiella                | 2.37 | Ruminiclostridium 6         | 3.65 |
|                                                                                 |       |                           |                 |                         |      | Eubacterium                 |      |
| Staphylococcus                                                                  | 3.53  | Oscillibacter             | 3.70            | Carnobacterium          | 2.37 | coprostanoligenes           | 3.53 |
| Coxiella                                                                        | 3.36  | Lachnospiraceae UCG_001   | 3.66            |                         |      | Ruminococcaceae, UBA1819    | 3.33 |
| Escherichia-Shigella                                                            | 3.35  | Lachnospiraceae UCG_010   | 3.60            |                         |      | Candidatus Saccharimonas    | 3.26 |
| Ehrlichia                                                                       | 3.32  | Harryflintia              | 3.59            |                         |      | Eubacterium xylanophilum    | 3.15 |
| Veillonella                                                                     | 3.32  | Ruminococcaceae UCG_013   | 3.55            |                         |      | Millionella                 | 3.14 |
| Candidatus                                                                      |       |                           |                 |                         |      |                             |      |
| Saccharimonas                                                                   | 3.26  | Ruminiclostridium 6       | 3.53            |                         |      | Rikenella                   | 3.10 |
| Carnobacterium                                                                  | 3.17  | Ruminococcaceae V9D2013   | 3.52            |                         |      | Roseburia                   | 3.10 |
| Streptococcus                                                                   | 3.16  | Cerasicoccus              | 3.44            |                         |      | Ruminococcaceae UCG_010     | 3.07 |
| Enterorhabdus                                                                   | 3.14  | Ruminococcaceae, UBA1819  | 3.39            |                         |      | Ruminococcaceae UCG_014     | 3.07 |
| Acinetobacter                                                                   | 3.00  | Erysipelotrichaceae       |                 |                         |      |                             |      |
|                                                                                 |       | UCG_004                   | 3.36            |                         |      | Ruminococcaceae NK4A214     | 3.05 |
| Fusobacterium                                                                   | 2.89  | Eubacterium               |                 |                         |      |                             |      |
|                                                                                 |       | coprostanoligenes         | 3.36            |                         |      | Eubacterium brachy          | 3.03 |
|                                                                                 |       | Ruminococcaceae           |                 |                         |      |                             |      |
|                                                                                 |       | GCA_900066225             | 3.31            |                         |      | Peptococcus                 | 3.03 |
|                                                                                 |       | Bilophila                 | 3.28            |                         |      | Intestinimonas              | 3.03 |
|                                                                                 |       |                           |                 |                         |      |                             |      |
|                                                                                 |       | Roseburia                 | 3.27            |                         |      | Mucispirillum               | 2.96 |
|                                                                                 |       | Lachnospiraceae,          |                 |                         |      |                             |      |
|                                                                                 |       | GCA_900066575             | 3.26            |                         |      | Ruminococcaceae UCG_009     | 2.94 |
|                                                                                 |       | Lachnospiraceae NK4B4     | 3.26            |                         |      | Ruminococcus 1              | 2.94 |
|                                                                                 |       | Ruminiclostridium 5       | 3.25            |                         |      | Acetatifactor               | 2.91 |
|                                                                                 |       | Ruminococcaceae UCG_014   | 3.24            |                         |      | Tyzzereella                 | 2.91 |
|                                                                                 |       | Candidatus Soleaferrea    | 3.23            |                         |      | Lachnospiraceae UCG_010     | 2.84 |
|                                                                                 |       | Mucispirillum             | 3.22            |                         |      | Ruminiclostridium 5         | 2.83 |
|                                                                                 |       |                           |                 |                         |      | Clostridiales, Family XIII, |      |
|                                                                                 |       | Intestinimonas            | 3.22            |                         |      | AD3011                      | 2.79 |
|                                                                                 |       | Ruminococcaceae UCG_010   | 3.21            |                         |      | Brachyspira                 | 2.76 |
|                                                                                 |       | Oxalobacter               | 3.19            |                         |      | Lachnospiraceae, ASF356     | 2.75 |
|                                                                                 |       | Rikenella                 | 3.17            |                         |      | Ruminococcaceae UCG_005     | 2.68 |
|                                                                                 |       | Ruminococcaceae NK4A214   | 3.17            |                         |      | Lachnospiraceae NC2004      | 2.65 |
|                                                                                 |       | Fournierella              | 3.17            |                         |      | Fournierella                | 2.62 |
|                                                                                 |       | Butyrivibrio              | 3.17            |                         |      | Bilophila                   | 2.57 |
|                                                                                 |       | Eubacterium xylanophilum  | 3.14            |                         |      | Pygma iobacter              | 2.56 |
|                                                                                 |       | Millionella               | 3.10            |                         |      | Eubacterium ruminantium     | 2.56 |
|                                                                                 |       | Acetatifactor             | 3.08            |                         |      | Ruminococcaceae UCG_004     | 2.53 |
|                                                                                 |       | Ruminococcaceae UCG_004   | 3.07            |                         |      | Eubacterium oxidoreducens   | 2.52 |
|                                                                                 |       | Ruminococcus 1            | 3.03            |                         |      | Harryflintia                | 2.51 |
|                                                                                 |       | Pygma iobacter            | 3.02            |                         |      | Candidatus Soleaferrea      | 2.48 |
|                                                                                 |       | Ruminococcaceae UCG_009   | 3.00            |                         |      | Oxalobacter                 | 2.48 |
|                                                                                 |       | Ruminococcaceae UCG_005   | 2.99            |                         |      | Butyrivibrio                | 2.48 |
|                                                                                 |       | Spirochaetaceae,          |                 |                         |      | Lachnospiraceae,            |      |
|                                                                                 |       | GWE2_31_10                | 2.99            |                         |      | GCA_900066575               | 2.37 |
|                                                                                 |       | Peptococcus               | 2.98            |                         |      | Lachnoclostridium           | 2.36 |
|                                                                                 |       | Butyrivibrio              | 2.93            |                         |      | Ruminococcaceae UCG_002     | 2.35 |
|                                                                                 |       | Ruminococcaceae UCG_002   | 2.92            |                         |      | Ruminococcaceae V9D2013     | 2.33 |
|                                                                                 |       | Brachyspira               | 2.89            |                         |      | Angela kisella              | 2.30 |
|                                                                                 |       |                           |                 |                         |      | Erysipelotrichaceae         |      |
|                                                                                 |       | Tyzzereella               | 2.87            |                         |      | UCG_004                     | 2.19 |

**Table S29:** More abundant bacterial genera as compared between the upper and lower GIT in *M. rufocanus* based on pairwise LEfSe analysis. LDA scores shown.

| Within species ( <i>M. rufocanus</i> ) pairwise between the upper and lower GIT |      |                                     |      |
|---------------------------------------------------------------------------------|------|-------------------------------------|------|
| Small Intestine - Rectum                                                        |      |                                     |      |
| Small Intestine                                                                 |      | Rectum                              |      |
| Genus                                                                           | LDA  | Genus                               | LDA  |
| Ureaplasma                                                                      | 4.68 | Lachnospiraceae UCG_010             | 4.48 |
| Lactobacillus                                                                   | 4.43 | Lachnospiraceae NK4A136             | 4.35 |
| Helicobacter                                                                    | 4.05 | Treponema 2                         | 4.34 |
| Rodentibacter                                                                   | 3.79 | Alistipes                           | 3.98 |
| Escherichia-Shigella                                                            | 3.36 | Ruminiclostridium                   | 3.98 |
| Veillonella                                                                     | 3.29 | Ruminococcus 1                      | 3.86 |
| Carnobacterium                                                                  | 3.09 | Anaerofilum                         | 3.84 |
| Streptococcus                                                                   | 2.93 | Ruminiclostridium 6                 | 3.80 |
| Coxiella                                                                        | 2.80 | Eubacterium xylanophilum            | 3.70 |
| Fusobacterium                                                                   | 2.69 | Clostridiales, Family XIII, UCG_001 | 3.67 |
|                                                                                 |      | Ruminiclostridium 9                 | 3.63 |
|                                                                                 |      | Ruminococcaeae, UBA1819             | 3.62 |
|                                                                                 |      | Oscillibacter                       | 3.55 |
|                                                                                 |      | Odoribacter                         | 3.55 |
|                                                                                 |      | Ruminococcaeae UCG_004              | 3.54 |
|                                                                                 |      | Lachnospiraceae FCS020              | 3.51 |
|                                                                                 |      | Lachnospiraceae, ASF356             | 3.49 |
|                                                                                 |      | Erysipelotrichaceae UCG_004         | 3.49 |
|                                                                                 |      | Ruminiclostridium 1                 | 3.48 |
|                                                                                 |      | Candidatus Saccharimonas            | 3.43 |
|                                                                                 |      | Ruminococcaeae UCG_014              | 3.39 |
|                                                                                 |      | Eubacterium coprostanoligenes       | 3.35 |
|                                                                                 |      | Ruminococcaeae UCG_010              | 3.34 |
|                                                                                 |      | Clostridiales, Family XIII, AD3011  | 3.32 |
|                                                                                 |      | Acetatifactor                       | 3.31 |
|                                                                                 |      | Eubacterium oxidoreducens           | 3.24 |
|                                                                                 |      | Ruminiclostridium 5                 | 3.22 |
|                                                                                 |      | Intestinimonas                      | 3.19 |
|                                                                                 |      | Lachnospiraceae NC2004              | 3.19 |
|                                                                                 |      | Ruminococcaeae NK4A214              | 3.18 |
|                                                                                 |      | Candidatus Soleaferrea              | 3.13 |
|                                                                                 |      | Bilophila                           | 3.12 |
|                                                                                 |      | Rikenella                           | 3.12 |
|                                                                                 |      | Peptococcus                         | 3.11 |
|                                                                                 |      | Ruminococcaeae GCA_900066225        | 3.09 |
|                                                                                 |      | Pygmaibacter                        | 3.08 |
|                                                                                 |      | Lachnospiraceae NK4B4               | 3.07 |
|                                                                                 |      | Millionella                         | 3.05 |
|                                                                                 |      | Ruminococcaeae UCG_009              | 2.99 |
|                                                                                 |      | Ruminococcaeae UCG_005              | 2.99 |
|                                                                                 |      | Brachyspira                         | 2.93 |
|                                                                                 |      | Fournierella                        | 2.93 |
|                                                                                 |      | Ruminococcaeae UCG_013              | 2.92 |
|                                                                                 |      | Mucispirillum                       | 2.92 |
|                                                                                 |      | Butyrivibrio                        | 2.92 |
|                                                                                 |      | Lachnoclostridium                   | 2.91 |
|                                                                                 |      | Eubacterium ruminantium             | 2.90 |
|                                                                                 |      | Lachnospiraceae, GCA_900066575      | 2.90 |
|                                                                                 |      | Ruminococcaeae UCG_002              | 2.89 |
|                                                                                 |      | Tyzzerella                          | 2.86 |
|                                                                                 |      | Oxalobacter                         | 2.86 |
|                                                                                 |      | Harryflintia                        | 2.66 |
|                                                                                 |      | Quinella                            | 2.62 |

**Table S29 (continued):** More abundant bacterial genera as compared between the upper and lower GIT in *M. rufocanus* based on pairwise LEfSe analysis. LDA scores shown.

| Within species ( <i>M. rufocanus</i> ) pairwise of the lower GIT |      |                          |      |                                   |      |       |     |                |     |                                    |      |
|------------------------------------------------------------------|------|--------------------------|------|-----------------------------------|------|-------|-----|----------------|-----|------------------------------------|------|
| Cecum - Rectum                                                   |      |                          |      | Colon - Cecum                     |      |       |     | Colon - Rectum |     |                                    |      |
| Cecum                                                            |      | Rectum                   |      | Colon                             |      | Cecum |     | Colon          |     | Rectum                             |      |
| Genus                                                            | LDA  | Genus                    | LDA  | Genus                             | LDA  | Genus | LDA | Genus          | LDA | Genus                              | LDA  |
| Oscillibacter                                                    | 3.64 | Ruminococcus 1           | 3.87 | Treponema2                        | 4.29 | —     | —   | —              | —   | Treponema 2                        | 4.00 |
|                                                                  |      | Eubacterium xylanophilum | 3.60 | Oscillibacter                     | 3.46 |       |     |                |     | Ruminococcus 1                     | 3.86 |
|                                                                  |      | Pygmaio bacter           | 2.74 | Clostridiales, FamilyXIII, AD3011 | 3.01 |       |     |                |     | Eubacterium xylanophilum           | 3.55 |
|                                                                  |      |                          |      | Peptococcus                       | 2.88 |       |     |                |     | Ruminiclostridium 6                | 3.47 |
|                                                                  |      |                          |      | Brachyspira                       | 2.76 |       |     |                |     | Coxiella                           | 3.39 |
|                                                                  |      |                          |      | Ruminococcaceae, UCG_005          | 2.55 |       |     |                |     | Bacteroides                        | 3.30 |
|                                                                  |      |                          |      |                                   |      |       |     |                |     | Acetatifactor                      | 3.05 |
|                                                                  |      |                          |      |                                   |      |       |     |                |     | Ruminiclostridium 5                | 2.89 |
|                                                                  |      |                          |      |                                   |      |       |     |                |     | Pygmaio bacter                     | 2.71 |
|                                                                  |      |                          |      |                                   |      |       |     |                |     | Peptococcus                        | 2.57 |
|                                                                  |      |                          |      |                                   |      |       |     |                |     | Ruminococcaceae, UCG_005           | 2.56 |
|                                                                  |      |                          |      |                                   |      |       |     |                |     | Clostridiales, Family XIII, AD3011 | 2.12 |

**Table S30:** More abundant bacterial genera as compared between the different regions of the lower GIT in *M. rufocanus* based on pairwise LEfSe analysis. LDA scores shown.

**Number of more abundant genera per host species (all species included, LefSe)**

|                        | <i>A. speciosus</i> | <i>A. argenteus</i> | <i>M. rufocanus</i> |
|------------------------|---------------------|---------------------|---------------------|
| <b>Small Intestine</b> | 17                  | 8                   | 10                  |
| <b>Cecum</b>           | 14                  | 9                   | 15                  |
| <b>Colon</b>           | 20                  | 8                   | 17                  |
| <b>Rectum</b>          | 15                  | 6                   | 16                  |
| <b>Average</b>         | 16.5                | 7.75                | 14.5                |

**Table S31:** Number of more abundant genera when gut region is compared among species based on LefSe analysis when all species were included.

**Number of more abundant genera per host species (pairwise LefSe)**

|                        | <i>A. speciosus</i> - <i>A. argenteus</i> |                     | <i>A. speciosus</i> - <i>M. rufocanus</i> |                     | <i>A. argenteus</i> - <i>M. rufocanus</i> |                     |
|------------------------|-------------------------------------------|---------------------|-------------------------------------------|---------------------|-------------------------------------------|---------------------|
|                        | <i>A. speciosus</i>                       | <i>A. argenteus</i> | <i>A. speciosus</i>                       | <i>M. rufocanus</i> | <i>A. argenteus</i>                       | <i>M. rufocanus</i> |
| <b>Small Intestine</b> | 6                                         | <b>28</b>           | 26                                        | 21                  | <b>41</b>                                 | 7                   |
| <b>Cecum</b>           | 9                                         | 7                   | 24                                        | 30                  | 22                                        | <b>28</b>           |
| <b>Colon</b>           | <b>12</b>                                 | 1                   | <b>32</b>                                 | 31                  | 18                                        | 23                  |
| <b>Rectum</b>          | 8                                         | 3                   | 22                                        | <b>32</b>           | 17                                        | 22                  |
| <b>Average</b>         | 8.75                                      | 9.75                | 26                                        | 28.5                | 24.5                                      | 20                  |

**Table S32:** Number of more abundant genera when gut region is compared among species based on pairwise LefSe analysis.

| Among species, all three host species included |                         |              |                          |             |                                    |                   |
|------------------------------------------------|-------------------------|--------------|--------------------------|-------------|------------------------------------|-------------------|
| Gut Region                                     | <i>A. speciosus</i>     |              | <i>A. argenteus</i>      |             | <i>M. rufocanus</i>                |                   |
|                                                | Genus                   | LDA          | Genus                    | LDA         | Genus                              | LDA               |
| Small intestine                                | Tyzzzeria 3             | 5.34         | Escherichia-Shigella     | 4.95        | Ureaplasma                         | 4.64              |
|                                                | Bergeyella              | 3.90         | Lactobacillus            | 4.70        | Ruminococcaceae, UCG_005           | 4.00              |
|                                                | Ruminiclostridium 5     | 3.75         | Streptococcus            | 4.42        | Desulfovibrio                      | 3.93              |
|                                                | Corynebacterium 1       | 3.67         | Gemella                  | 3.70        | Ruminococcaceae, UCG_010           | 3.92              |
|                                                | Turicibacter            | 3.59         | Providencia              | 3.36        | Candidatus Saccharimonas           | 3.60              |
|                                                | Serratia                | 3.55         | Leptotrichia             | 3.29        | Lachnospiraceae NK4A136            | 3.47              |
|                                                | Bacteroides             | 3.30         | Treponema 2              | 3.20        | Ruminiclostridium                  | 3.27              |
|                                                | Mucispirillum           | 3.27         | Coxiella                 | 2.82        | Ruminiclostridium 6                | 3.25              |
|                                                | Prevotellaceae, UCG_001 | 3.20         |                          |             | Roseburia                          | 3.23              |
|                                                | Muribaculum             | 3.16         |                          |             | Ruminococcus 1                     | 3.21              |
|                                                | Rikenellaceae RC9       | 3.15         |                          |             |                                    |                   |
|                                                | Prevotellaceae Ga6A1    | 3.14         |                          |             |                                    |                   |
|                                                | Parasutterella          | 3.10         |                          |             |                                    |                   |
|                                                | Odoribacter             | 3.05         |                          |             |                                    |                   |
|                                                | Prevotellaceae, UCG_003 | 3.00         |                          |             |                                    |                   |
|                                                | Rikenella               | 2.98         |                          |             |                                    |                   |
|                                                | Fusobacterium           | 2.74         |                          |             |                                    |                   |
|                                                | Cecum                   | Helicobacter | 4.58                     | Treponema 2 | 4.54                               | Ruminiclostridium |
| Bacteroides                                    |                         | 4.32         | Alistipes                | 4.25        | Candidatus Saccharimonas           | 3.61              |
| Oscillibacter                                  |                         | 4.03         | Rikenellaceae RC9        | 4.20        | Ruminiclostridium 6                | 3.38              |
| Prevotellaceae, UCG_003                        |                         | 4.01         | Escherichia-Shigella     | 3.92        | Clostridiales, Family XIII, AD3011 | 3.33              |
| Prevotellaceae Ga6A1                           |                         | 3.94         | Brachyspira              | 3.61        | Ruminococcaceae, UCG_005           | 3.25              |
| Mucispirillum                                  |                         | 3.94         | Streptococcus            | 3.47        | Eubacterium xylanophilum           | 3.22              |
| Tyzzzeria 3                                    |                         | 3.85         | Turicibacter             | 3.12        | Ruminococcaceae, UCG_013           | 3.22              |
| Ruminiclostridium 9                            |                         | 3.79         | Parasutterella           | 2.96        | Peptococcus                        | 3.18              |
| Muribaculum                                    |                         | 3.31         | Lachnospiraceae, UCG_006 | 2.88        | Ruminococcaceae, UCG_009           | 3.13              |
| Prevotellaceae, UCG_001                        |                         | 3.29         |                          |             | Ruminococcaceae, UCG_010           | 3.08              |
| Eubacterium nodatum                            |                         | 3.17         |                          |             | Ruminococcaceae NK4A214            | 3.07              |
| Lachnospiraceae, GCA_900066575                 |                         | 2.86         |                          |             | Ruminococcus 1                     | 3.02              |
| Butyrivococcus                                 |                         | 2.81         |                          |             | Candidatus Soleaferrea             | 3.00              |
| Bilophila                                      |                         | 2.81         |                          |             | Desulfovibrio                      | 2.98              |
|                                                |                         |              |                          |             | Oxalobacter                        | 2.86              |

**Table S33:** More abundant bacterial genera within the small intestine and cecum of each host species when all three hosts were included in LEfSe analysis. LDA scores shown.

| Among species, all three host species included |                                |             |                          |            |                                    |             |
|------------------------------------------------|--------------------------------|-------------|--------------------------|------------|------------------------------------|-------------|
| Gut Region                                     | <i>A. speciosus</i>            |             | <i>A. argenteus</i>      |            | <i>M. rufocanus</i>                |             |
|                                                | Genus                          | LDA         | Genus                    | LDA        | Genus                              | LDA         |
| Colon                                          | Helicobacter                   | 4.62        | Mycoplasma               | 4.56       | Treponema 2                        | 3.92        |
|                                                | Rikenellaceae RC9              | 4.22        | Alistipes                | 4.26       | Clostridiales, Family XIII AD3011  | 3.88        |
|                                                | Bacteroides                    | 4.19        | Escherichia-Shigella     | 4.08       | Ruminiclostridium                  | 3.76        |
|                                                | Tyzzera 3                      | 4.04        | Prevotella 9             | 3.85       | Candidatus Saccharimonas           | 3.52        |
|                                                | Mucispirillum                  | 3.89        | Prevotellaceae, UCG_003  | 3.85       | Ruminiclostridium 6                | 3.47        |
|                                                | Prevotellaceae Ga6A1           | 3.86        | Rikenella                | 3.59       | Oxalobacter                        | 3.35        |
|                                                | Streptococcus                  | 3.69        | Parasutterella           | 3.08       | Ruminococcaceae, UCG_005           | 3.28        |
|                                                | Eubacterium nodatum            | 3.44        | Brachyspira              | 2.90       | Desulfovibrio                      | 3.27        |
|                                                | Enterorhabdus                  | 3.22        |                          |            | Eubacterium xylanophilum           | 3.24        |
|                                                | Ruminiclostridium 5            | 3.20        |                          |            | Ruminococcaceae, UCG_010           | 3.21        |
|                                                | Muribaculum                    | 3.18        |                          |            | Ruminococcaceae NK4A214            | 3.12        |
|                                                | Butyricoccus                   | 3.15        |                          |            | Ruminococcaceae, UCG_009           | 3.07        |
|                                                | Prevotellaceae, UCG_001        | 3.13        |                          |            | Ruminococcaceae, UCG_013           | 3.06        |
|                                                | Lachnospiraceae, UCG_006       | 3.07        |                          |            | Anaeroplasm                        | 3.05        |
|                                                | Blautia                        | 2.99        |                          |            | Peptococcus                        | 3.03        |
|                                                | Lachnospiraceae, GCA_900066575 | 2.92        |                          |            | Ruminococcus 1                     | 2.99        |
|                                                | Cerasicoccus                   | 2.91        |                          |            | Candidatus Soleaferrea             | 2.81        |
|                                                | Tyzzera                        | 2.91        |                          |            |                                    |             |
|                                                | Turicibacter                   | 2.83        |                          |            |                                    |             |
|                                                | Rectum                         | Bacteroides | 4.41                     | Mycoplasma | 4.41                               | Treponema 2 |
| Helicobacter                                   |                                | 4.26        | Alistipes                | 4.39       | Ruminococcus 1                     | 3.85        |
| Escherichia-Shigella                           |                                | 4.11        | Rikenellaceae, RC9 gut   | 4.32       | Ruminiclostridium                  | 3.84        |
| Prevotellaceae, UCG_003                        |                                | 4.06        | Rikenella                | 3.93       | Candidatus Saccharimonas           | 3.76        |
| Prevotellaceae Ga6A1                           |                                | 4.05        | Lachnospiraceae, UCG_006 | 3.19       | Eubacterium xylanophilum           | 3.73        |
| Streptococcus                                  |                                | 3.96        | Brachyspira              | 3.02       | Peptococcus                        | 3.73        |
| Mucispirillum                                  |                                | 3.73        |                          |            | Candidatus Soleaferrea             | 3.42        |
| Tyzzera 3                                      |                                | 3.58        |                          |            | Clostridiales, Family XIII, AD3011 | 3.42        |
| Eubacterium nodatum                            |                                | 3.53        |                          |            | Ruminiclostridium 6                | 3.41        |
| Prevotellaceae, UCG_001                        |                                | 3.47        |                          |            | Acetatifactor                      | 3.31        |
| Muribaculum                                    |                                | 3.39        |                          |            | Ruminococcaceae, UCG_010           | 3.29        |
| Butyricoccus                                   |                                | 3.03        |                          |            | Desulfovibrio                      | 3.29        |
| Parasutterella                                 |                                | 3.00        |                          |            | Ruminococcaceae, UCG_009           | 3.20        |
| Turicibacter                                   |                                | 2.90        |                          |            | Ruminococcaceae NK4A214            | 3.19        |
| Parabacteroides                                |                                | 2.82        |                          |            | Oxalobacter                        | 3.09        |
|                                                |                                |             |                          |            | Anaeroplasm                        | 3.06        |

**Table S33 (continued):** More abundant bacterial genera within the colon and rectum of each host species when all three hosts were included in LEfSe analysis. LDA scores shown.

| Small Intestine                           |      |                        |      |                                           |      |                                    |      |
|-------------------------------------------|------|------------------------|------|-------------------------------------------|------|------------------------------------|------|
| <i>A. speciosus</i> - <i>A. argenteus</i> |      |                        |      | <i>A. speciosus</i> - <i>M. rufocanus</i> |      |                                    |      |
| <i>A. speciosus</i>                       |      | <i>A. argenteus</i>    |      | <i>A. speciosus</i>                       |      | <i>M. rufocanus</i>                |      |
| Genus                                     | LDA  | Genus                  | LDA  | Genus                                     | LDA  | Genus                              | LDA  |
| Tyzzereella 3                             | 5.32 | Mycoplasma             | 4.81 | Tyzzereella 3                             | 5.33 | Ureaplasma                         | 4.40 |
| Ureaplasma                                | 4.33 | Lactobacillus          | 4.74 | Escherichia-Shigella                      | 4.65 | Lactobacillus                      | 4.31 |
| Ruminiclostridium 5                       | 3.73 | Streptococcus          | 4.25 | Streptococcus                             | 3.99 | Desulfovibrio                      | 3.95 |
| Prevotellaceae Ga6A1                      | 3.19 | Rodentibacter          | 4.15 | Porphyromonas                             | 3.97 | Candidatus Saccharimonas           | 3.65 |
| Fusobacterium                             | 2.57 | Lachnospiraceae NC2004 | 3.50 | Ruminiclostridium 5                       | 3.73 | Ruminococcaceae, UCG_010           | 3.55 |
| Mucispirillum                             | 2.30 | Minicystis             | 3.48 | Delftia                                   | 3.67 | Clostridiales, Family XIII, AD3011 | 3.53 |
|                                           |      | Chryseobacterium       | 3.43 | Turicibacter                              | 3.59 | Rickettsia                         | 3.51 |
|                                           |      | Pelosinus              | 3.33 | Bacteroidales RF16                        | 3.52 | Ruminococcaceae, UCG_005           | 3.48 |
|                                           |      | Gemmatimonas           | 3.33 | Anaerobacillus                            | 3.51 | Lachnospiraceae NK4A136            | 3.38 |
|                                           |      | Sphingomonas           | 3.26 | Faecalibaculum                            | 3.33 | Fournierella                       | 3.28 |
|                                           |      | Haliangium             | 3.23 | Gemella                                   | 3.29 | Peptococcus                        | 3.25 |
|                                           |      | Phyllobacterium        | 3.20 | Bacteroides                               | 3.28 | Ruminococcaceae, UBA1819           | 2.94 |
|                                           |      | Aquicella              | 3.20 | Corynebacterium 1                         | 3.20 | Lachnospiraceae NC2004             | 2.88 |
|                                           |      | Variovorax             | 3.18 | Serratia                                  | 3.12 | Ruminococcus 1                     | 2.86 |
|                                           |      | Sandaracinus           | 3.13 | Rikenellaceae RC9                         | 3.10 | Roseburia                          | 2.84 |
|                                           |      | Phaselicystis          | 3.11 | Prevotellaceae Ga6A1                      | 3.09 | Millionella                        | 2.74 |
|                                           |      | Leptotrichia           | 3.11 | Parasutterella                            | 3.00 | Ruminiclostridium 6                | 2.66 |
|                                           |      | Methylobacterium       | 3.00 | Bergeyella                                | 2.95 | Eubacterium xylanophilum           | 2.65 |
|                                           |      | Bifidobacterium        | 2.88 | Rikenella                                 | 2.92 | Ruminiclostridium                  | 2.61 |
|                                           |      | Bradyrhizobium         | 2.86 | Acinetobacter                             | 2.83 | Coxiella                           | 2.57 |
|                                           |      | Ilumatobacter          | 2.83 | Treponema 2                               | 2.82 | Candidatus Cardinium               | 2.53 |
|                                           |      | Streptomyces           | 2.75 | Muribaculum                               | 2.79 |                                    |      |
|                                           |      | Paludibacter           | 2.72 | Prevotellaceae, UCG_001                   | 2.77 |                                    |      |
|                                           |      | Campylobacter          | 2.59 | Prevotellaceae, UCG_003                   | 2.73 |                                    |      |
|                                           |      | Coxiella               | 2.56 | Leptotrichia                              | 2.62 |                                    |      |
|                                           |      | Brachyspira            | 2.50 | Odoribacter                               | 2.57 |                                    |      |
|                                           |      | Gemella                | 2.28 | Fusobacterium                             | 2.30 |                                    |      |

**Table S34:** More abundant bacterial genera within the small intestine of each host species based on LEfSe analysis between *A. speciosus* and either *A. argenteus* or *M. rufocanus*. LDA scores shown.



| Small Intestine                           |      |                               |      |
|-------------------------------------------|------|-------------------------------|------|
| <i>M. rufocanus</i> - <i>A. argenteus</i> |      |                               |      |
| <i>M. rufocanus</i>                       |      | <i>A. argenteus</i>           |      |
| Genus                                     | LDA  | Genus                         | LDA  |
| Ureaplasma                                | 4.63 | Escherichia-Shigella          | 5.02 |
| Desulfovibrio                             | 3.91 | Mycoplasma                    | 4.99 |
| Candidatus                                |      | Spirochaeta 2                 | 4.82 |
| Saccharimonas                             | 3.63 | Streptococcus                 | 4.42 |
| Enterorhabdus                             | 2.62 | Rodentibacter                 | 4.02 |
| Ruminiclostridium 6                       | 2.60 | Turicibacter                  |      |
| Eubacterium                               |      | Bradyrhizobium                | 3.52 |
| xylanophilum                              | 2.52 | Ilumatobacter                 | 3.36 |
| Ruminococcus 1                            | 2.48 | Prevotellaceae, UCG_001       | 3.29 |
|                                           |      | Leptotrichia                  | 3.24 |
|                                           |      | Variovorax                    | 3.19 |
|                                           |      | Paludibacter                  | 3.18 |
|                                           |      | Candidatus Xiphinemato bacter | 3.07 |
|                                           |      | Pirellula                     | 3.04 |
|                                           |      | Gemmatimonas                  | 3.01 |
|                                           |      | Phaselicystis                 | 2.98 |
|                                           |      | Gaiella                       | 2.94 |
|                                           |      | Bifidobacterium               | 2.93 |
|                                           |      | Devosia                       | 2.81 |
|                                           |      | Sandaracinus                  | 2.74 |
|                                           |      | Prevotella 9                  | 2.67 |
|                                           |      | Bacteroides                   | 2.55 |
|                                           |      | Campylobacter                 | 2.54 |
|                                           |      | Providencia                   | 2.47 |
|                                           |      | Prevotellaceae, UCG_003       | 2.45 |
|                                           |      | Ilumatobacteraceae, CL500_29  | 2.44 |
|                                           |      | marine                        | 2.44 |
|                                           |      | Weissella                     | 2.43 |
|                                           |      | Phyllobacterium               | 2.41 |
|                                           |      | Pelosinus                     | 2.36 |
|                                           |      | Gemella                       | 2.32 |
|                                           |      | Parasutterella                | 2.31 |
|                                           |      | Coxiella                      | 2.28 |
|                                           |      | Muribaculum                   | 2.19 |
|                                           |      | Halangium                     | 2.18 |
|                                           |      | Streptomyces                  | 2.16 |
|                                           |      | Pseudomonas                   | 2.15 |
|                                           |      | Corynebacterium 1             | 2.15 |
|                                           |      | Rikenellaceae RC9             | 2.12 |
|                                           |      | Methylobacterium              | 2.10 |
|                                           |      | Brochothrix                   | 2.00 |

**Table S34 (continued):** More abundant bacterial genera within the small intestine of each host species based on LEfSe analysis between *M. rufocanus* and *A. argenteus*.

| Cecum                                     |      |                     |      |                                           |      |                                       |      |
|-------------------------------------------|------|---------------------|------|-------------------------------------------|------|---------------------------------------|------|
| <i>A. speciosus</i> - <i>A. argenteus</i> |      |                     |      | <i>A. speciosus</i> - <i>M. rufocanus</i> |      |                                       |      |
| <i>A. speciosus</i>                       |      | <i>A. argenteus</i> |      | <i>A. speciosus</i>                       |      | <i>M. rufocanus</i>                   |      |
| Genus                                     | LDA  | Genus               | LDA  | Genus                                     | LDA  | Genus                                 | LDA  |
| Helicobacter                              | 4.46 | Campylobacter       | 4.62 | Helicobacter                              | 4.58 | Treponema 2                           | 4.39 |
| Oscillibacter                             | 4.02 | Treponema 2         | 4.54 | Bacteroides                               | 4.31 | Ruminiclostridium                     | 3.76 |
| Mucispirillum                             | 3.93 | Brachyspira         | 3.69 | Alistipes                                 | 4.07 | Candidatus Saccharimonas              | 3.55 |
| Tyzzereella 3                             | 3.86 | Rikenella           | 3.52 | Oscillibacter                             | 4.02 | Ruminiclostridium 6                   | 3.33 |
| Ruminiclostridium 9                       | 3.81 | Streptococcus       | 3.33 | Rikenellaceae RC9 gut                     | 3.98 | Ruminococcaceae,<br>UBA1819           | 3.32 |
| Ruminiclostridium                         | 3.62 | Oxalobacter         | 2.92 | Prevotellaceae, UCG_003                   | 3.97 | Eubacterium xylanophilum              | 3.21 |
| Ureaplasma                                | 3.22 | Rickettsia          | 2.92 | Prevotellaceae, Ga6A1                     | 3.96 | Millionella                           | 3.17 |
| Ruminococcaceae,<br>UCG_014               | 3.07 |                     |      | Mucispirillum                             | 3.90 | Peptococcus                           | 3.05 |
| Ruminococcaceae,<br>UCG_009               | 2.92 |                     |      | Ruminiclostridium 9                       | 3.82 | Erysipelotrichaceae,<br>UCG_004       | 2.99 |
|                                           |      |                     |      | Tyzzereella 3                             | 3.81 | Ruminococcaceae,<br>UCG_010           | 2.98 |
|                                           |      |                     |      | Escherichia-Shigella                      | 3.79 | Ruminococcaceae<br>NK4A214            | 2.97 |
|                                           |      |                     |      | Muribaculum                               | 3.33 | Eubacterium oxidoreducens             | 2.94 |
|                                           |      |                     |      | Intestinimonas                            | 3.27 | Desulfovibrio                         | 2.90 |
|                                           |      |                     |      | Prevotellaceae, UCG_001                   | 3.24 | Ruminococcaceae,<br>UCG_009           | 2.89 |
|                                           |      |                     |      | Streptococcus                             | 3.19 | Ruminococcus 1                        | 2.88 |
|                                           |      |                     |      | Eubacterium nodatum                       | 2.98 | Ruminococcaceae,<br>V9D2013           | 2.83 |
|                                           |      |                     |      | Lachnospiraceae,<br>GCA_900066575         | 2.92 | Ruminococcaceae,<br>UCG_013           | 2.81 |
|                                           |      |                     |      | Lachnospiraceae,<br>UCG_006               | 2.84 | Ruminococcaceae,<br>UCG_005           | 2.79 |
|                                           |      |                     |      | Parasutterella                            | 2.81 | Brachyspira                           | 2.79 |
|                                           |      |                     |      | Lachnoclostridium                         | 2.75 | Anaerostipes                          | 2.79 |
|                                           |      |                     |      | Parabacteroides                           | 2.74 | Lachnospiraceae NK4B4                 | 2.78 |
|                                           |      |                     |      | Bilophila                                 | 2.74 | Clostridiales, Family XIII,<br>AD3011 | 2.75 |
|                                           |      |                     |      | Butyrivococcus                            | 2.72 | Pygmaibacter                          | 2.73 |
|                                           |      |                     |      | Coriobacteriaceae,<br>UCG_002             | 2.58 | Eubacterium ruminantium               | 2.72 |
|                                           |      |                     |      |                                           |      | Foumierella                           | 2.69 |
|                                           |      |                     |      |                                           |      | Candidatus Soleaferrea                | 2.61 |
|                                           |      |                     |      |                                           |      | Quinella                              | 2.61 |
|                                           |      |                     |      |                                           |      | Oxalobacter                           | 2.59 |
|                                           |      |                     |      |                                           |      | Harryflintia                          | 2.56 |
|                                           |      |                     |      |                                           |      | Ruminococcaceae,<br>GCA_900066225     | 2.39 |

**Table S35:** More abundant bacterial genera within the cecum of each host species based on LEfSe analysis between *A. speciosus* and either *A. argenteus* or *M. rufocanus*. LDA scores shown.

| Cecum                                     |      |                                   |      |
|-------------------------------------------|------|-----------------------------------|------|
| <i>M. rufocanus</i> - <i>A. argenteus</i> |      |                                   |      |
| <i>M. rufocanus</i>                       |      | <i>A. argenteus</i>               |      |
| Genus                                     | LDA  | Genus                             | LDA  |
| Ruminiclostridium                         | 3.97 | Bacteroides                       | 4.30 |
| Candidatus Saccharimonas                  | 3.60 | Alistipes                         | 4.25 |
| Ruminococcaceae V9D2013                   | 3.46 | Rikenellaceae RC9 gut             | 4.21 |
| Clostridiales vadinBB60                   | 3.39 | Prevotellaceae, UCG_003           | 4.00 |
| Tyzzzeria 3                               | 3.39 | Prevotella 9                      | 3.94 |
| Ruminiclostridium 6                       | 3.36 | Mycoplasma                        | 3.94 |
| Erysipelotrichaceae, UCG_004              | 3.34 | Escherichia-Shigella              | 3.92 |
| Ruminococcaceae, UBA1819                  | 3.31 | Prevotellaceae, Ga6A1             | 3.79 |
| Ruminococcaceae, UCG_005                  | 3.28 | Rikenella                         | 3.65 |
| Eubacterium xylanophilum                  | 3.27 | Butyricoccus                      | 3.65 |
| Anaeroplasm                               | 3.24 | Streptococcus                     | 3.54 |
| Candidatus Soleaferrea                    | 3.23 | Lachnospiraceae, A2               | 3.50 |
| Ruminococcaceae, UCG_013                  | 3.22 | Lachnospiraceae,<br>GCA_900066575 | 3.39 |
| Clostridiales, Family XIII,<br>AD3011     | 3.22 | Eubacterium nodatum               | 3.38 |
| Millionella                               | 3.18 | Ruminococcaceae, UCG_004          | 3.34 |
| Ruminococcaceae, UCG_009                  | 3.17 | Turicibacter                      | 3.27 |
| Peptococcus                               | 3.17 | Prevotellaceae, UCG_001           | 3.20 |
| Ruminococcaceae, UCG_014                  | 3.12 | Lachnospiraceae, UCG_006          | 3.15 |
| Ruminococcaceae NK4A214                   | 3.10 | Blautia                           | 3.11 |
| Ruminococcaceae, UCG_010                  | 3.10 | Parasutterella                    | 3.07 |
| Ruminococcus 1                            | 3.06 | Muribaculum                       | 3.03 |
| Ureaplasma                                | 3.02 |                                   |      |
| Pygmaibacter                              | 3.02 |                                   |      |
| Harryflintia                              | 3.01 |                                   |      |
| Oxalobacter                               | 3.01 |                                   |      |
| Fournierella                              | 3.01 |                                   |      |
| Desulfovibrio                             | 2.98 |                                   |      |
| Eubacterium ruminantium                   | 2.91 |                                   |      |

**Table S35 (continued):** More abundant bacterial genera within the cecum of each host species based on LEfSe analysis between *M. rufocanus* and *A. argenteus*.

| Colon                                     |      |                          |      |                                           |      |                                    |      |
|-------------------------------------------|------|--------------------------|------|-------------------------------------------|------|------------------------------------|------|
| <i>A. speciosus</i> - <i>A. argenteus</i> |      |                          |      | <i>A. speciosus</i> - <i>M. rufocanus</i> |      |                                    |      |
| <i>A. speciosus</i>                       |      | <i>A. argenteus</i>      |      | <i>A. speciosus</i>                       |      | <i>M. rufocanus</i>                |      |
| Genus                                     | LDA  | Genus                    | LDA  | Genus                                     | LDA  | Genus                              | LDA  |
| Tyzzereella 3                             | 4.06 | Campylobacter            | 4.42 | Helicobacter                              | 4.60 | Treponema 2                        | 4.00 |
| Mucispirillum                             | 3.86 | Prevotellaceae, UCG_003  | 3.69 | Rikenellaceae RC9                         | 4.23 | Ruminiclostridium                  | 3.79 |
| Eubacterium coprostanoligenes             | 3.44 | Delftia                  | 3.01 | Bacteroides                               | 4.19 | Candidatus Saccharimonas           | 3.47 |
| Ureaplasma                                | 3.43 | Brachyspira              | 2.76 | Alistipes                                 | 4.10 | Ruminococcaceae, UBA1819           | 3.38 |
| Streptococcus                             | 3.33 | Eubacterium xylanophilum | 2.59 | Tyzzereella 3                             | 4.06 | Desulfovibrio                      | 3.23 |
| Ruminiclostridium 5                       | 3.17 | Oxalobacter              | 2.46 | Mycoplasma                                | 3.97 | Eubacterium xylanophilum           | 3.20 |
| Ruminococcaceae, UCG_014                  | 3.13 |                          |      | Prevotellaceae, UCG_003                   | 3.89 | Ruminiclostridium 6                | 3.15 |
| Prevotellaceae, UCG_001                   | 2.83 |                          |      | Prevotellaceae Ga6A1                      | 3.86 | Millionella                        | 3.07 |
| Ruminococcaceae, UCG_010                  | 2.67 |                          |      | Streptococcus                             | 3.69 | Ruminococcaceae NK4A214            | 3.04 |
| Lachnospiraceae, UCG_006                  | 2.44 |                          |      | Escherichia-Shigella                      | 3.67 | Ruminococcaceae, UCG_010           | 3.03 |
| Ruminococcus 1                            | 2.36 |                          |      | Oscillibacter                             | 3.59 | Ruminococcaceae, UCG_009           | 2.84 |
| Enterorhabdus                             | 2.30 |                          |      | Prevotella 9                              | 3.43 | Anaerostipes                       | 2.79 |
|                                           |      |                          |      | Leptotrichia                              | 3.19 | Clostridiales, Family XIII, AD3011 | 2.74 |
|                                           |      |                          |      | Muribaculum                               | 3.15 | Ruminococcus 1                     | 2.73 |
|                                           |      |                          |      | Ruminiclostridium 5                       | 3.07 | Anaerovorax                        | 2.71 |
|                                           |      |                          |      | Prevotellaceae, UCG_001                   | 3.06 | Anaeroplasma                       | 2.70 |
|                                           |      |                          |      | Lachnospiraceae, GCA_900066575            | 2.96 | Peptococcus                        | 2.69 |
|                                           |      |                          |      | Rikenella                                 | 2.88 | Ruminococcaceae, UCG_005           | 2.60 |
|                                           |      |                          |      | Gemella                                   | 2.85 | Fourmierella                       | 2.57 |
|                                           |      |                          |      | Eubacterium brachy                        | 2.80 | Pygmaibacter                       | 2.53 |
|                                           |      |                          |      | Tyzzereella                               | 2.78 | Ruminococcaceae V9D2013            | 2.50 |
|                                           |      |                          |      | Corynebacterium 1                         | 2.61 | Eubacterium ruminantium            | 2.48 |
|                                           |      |                          |      | Lachnospiraceae, UCG_006                  | 2.60 | Quinella                           | 2.48 |
|                                           |      |                          |      | Parabacteroides                           | 2.57 | Oxalobacter                        | 2.46 |
|                                           |      |                          |      | Parasutterella                            | 2.45 | Lachnospiraceae NK4B4              | 2.42 |
|                                           |      |                          |      | Turicibacter                              | 2.45 | Harryflintia                       | 2.38 |
|                                           |      |                          |      | Lachnoclostridium                         | 2.40 | Ruminococcaceae, GCA_900066225     | 2.36 |
|                                           |      |                          |      | Blautia                                   | 2.40 | Candidatus Soleaferrea             | 2.36 |
|                                           |      |                          |      | Eubacterium nodatum                       | 2.34 | Spirochaetaceae, GWE2_31_10        | 2.35 |
|                                           |      |                          |      | Butyricoccus                              | 2.12 | Brachyspira                        | 2.34 |
|                                           |      |                          |      | Enterorhabdus                             | 2.10 | Erysipelotrichaceae, UCG_004       | 2.24 |
|                                           |      |                          |      | Cerasicoccus                              | 2.08 |                                    |      |

**Table S36:** More abundant bacterial genera within the colon of each host species based on LEfSe analysis between *A. speciosus* and either *A. argenteus* or *M. rufocanus*. LDA scores shown.

| Colon                                     |      |                                   |      |
|-------------------------------------------|------|-----------------------------------|------|
| <i>M. rufocanus</i> - <i>A. argenteus</i> |      |                                   |      |
| <i>M. rufocanus</i>                       |      | <i>A. argenteus</i>               |      |
| Genus                                     | LDA  | Genus                             | LDA  |
| Ruminiclostridium                         | 3.75 | Mycoplasma                        | 4.49 |
| Candidatus Saccharimonas                  | 3.49 | Campylobacter                     | 4.42 |
| Ruminiclostridium 6                       | 3.48 | Alistipes                         | 4.17 |
| Ruminococcaceae,<br>UBA1819               | 3.35 | Bacteroides                       | 4.02 |
| Desulfovibrio                             | 3.28 | Rikenellaceae RC9                 | 4.01 |
| Eubacterium xylanophilum                  | 3.21 | Prevotella 9                      | 3.90 |
| Eubacterium<br>coprostanoligenes          | 3.20 | Prevotellaceae, UCG_003           | 3.86 |
| Ruminococcaceae,<br>UCG_010               | 3.17 | Streptococcus                     | 3.63 |
| Ruminococcaceae,<br>UCG_014               | 3.12 | Prevotellaceae, Ga6A1             | 3.59 |
| Mucispirillum                             | 3.11 | Rikenella                         | 3.58 |
| Ruminococcaceae<br>NK4A214                | 3.08 | Leptotrichia                      | 3.40 |
| Millionella                               | 3.07 | Eubacterium nodatum               | 3.09 |
| Anaeroplasmata                            | 3.00 | Muribaculum                       | 2.94 |
| Ruminococcaceae<br>V9D2013                | 2.94 | Prevotellaceae, UCG_001           | 2.84 |
| Ruminococcus 1                            | 2.94 | Parasutterella                    | 2.83 |
| Ureaplasma                                | 2.92 | Lachnospiraceae,<br>GCA_900066575 | 2.81 |
| Ruminococcaceae,<br>UCG_009               | 2.91 | Turicibacter                      | 2.79 |
| Peptococcus                               | 2.80 | Lachnospiraceae, UCG_006          | 2.65 |
| Pygma iobacter                            | 2.79 |                                   |      |
| Ruminiclostridium 5                       | 2.66 |                                   |      |
| Fournierella                              | 2.63 |                                   |      |
| Ruminococcaceae,<br>UCG_005               | 2.57 |                                   |      |
| Candidatus Solea ferrea                   | 2.50 |                                   |      |

**Table S36 (continued):** More abundant bacterial genera within the colon of each host species based on LEfSe analysis between *M. rufocanus* and *A. argenteus*.

| Rectum                                    |      |                     |      |                                           |      |                                       |      |
|-------------------------------------------|------|---------------------|------|-------------------------------------------|------|---------------------------------------|------|
| <i>A. speciosus</i> - <i>A. argenteus</i> |      |                     |      | <i>A. speciosus</i> - <i>M. rufocanus</i> |      |                                       |      |
| <i>A. speciosus</i>                       |      | <i>A. argenteus</i> |      | <i>A. speciosus</i>                       |      | <i>M. rufocanus</i>                   |      |
| Genus                                     | LDA  | Genus               | LDA  | Genus                                     | LDA  | Genus                                 | LDA  |
| Helicobacter                              | 4.18 | Campylobacter       | 4.35 | Bacteroides                               | 4.41 | Peptococcus                           | 3.02 |
| Mucispirillum                             | 3.79 | Rikenella           | 3.74 | Helicobacter                              | 4.26 | Treponema 2                           | 4.17 |
| Streptococcus                             | 3.67 | Brachyspira         | 3.44 | Alistipes                                 | 4.25 | Bacteroidales, F082                   | 4.12 |
| Tyzzzeria 3                               | 3.57 |                     |      | Rikenellaceae RC9                         | 4.17 | Ruminococcus 1                        | 3.88 |
| Ureaplasma                                | 3.28 |                     |      | Escherichia-Shigella                      | 4.09 | Eubacterium xylanophilum              | 3.75 |
| Ruminococcaceae,<br>UCG_002               | 2.87 |                     |      | Prevotellaceae Ga6A1                      | 4.07 | Candidatus Saccharimonas              | 3.70 |
| Bilophila                                 | 2.74 |                     |      | Prevotellaceae,<br>UCG_003                | 4.01 | Ruminiclostridium                     | 3.66 |
| Enterorhabdus                             | 2.52 |                     |      | Streptococcus                             | 4.00 | Ruminiclostridium 6                   | 3.43 |
|                                           |      |                     |      | Mycoplasma                                | 3.92 | Anaerofilum                           | 3.39 |
|                                           |      |                     |      | Mucispirillum                             | 3.77 | Desulfovibrio                         | 3.25 |
|                                           |      |                     |      | Oscillibacter                             | 3.63 | Acetatifactor                         | 3.25 |
|                                           |      |                     |      | Tyzzzeria 3                               | 3.56 | Ruminococcaceae, UCG_010              | 3.19 |
|                                           |      |                     |      | Prevotellaceae,<br>UCG_001                | 3.43 | Millionella                           | 3.02 |
|                                           |      |                     |      | Rikenella                                 | 3.41 | Ruminococcaceae NK4A214               | 2.99 |
|                                           |      |                     |      | Muribaculum                               | 3.31 | Pygmaibacter                          | 2.91 |
|                                           |      |                     |      | Parasutterella                            | 2.82 | Anaeroplasma                          | 2.90 |
|                                           |      |                     |      | Eubacterium nodatum                       | 2.73 | Ruminococcaceae, UCG_005              | 2.87 |
|                                           |      |                     |      | Lachnospiraceae,<br>UCG_006               | 2.67 | Fournierella                          | 2.87 |
|                                           |      |                     |      | Ruminococcaceae,<br>UCG_004               | 2.63 | Erysipelotrichaceae, UCG_004          | 2.86 |
|                                           |      |                     |      | Parabacteroides                           | 2.63 | Ruminococcaceae, UCG_009              | 2.79 |
|                                           |      |                     |      | Turicibacter                              | 2.63 | Ruminococcaceae V9D2013               | 2.78 |
|                                           |      |                     |      | Butyricoccus                              | 2.42 | Anaerostipes                          | 2.75 |
|                                           |      |                     |      |                                           |      | Lachnospiraceae FCS020                | 2.72 |
|                                           |      |                     |      |                                           |      | Clostridiales, Family XIII,<br>AD3011 | 2.64 |
|                                           |      |                     |      |                                           |      | Eubacterium ruminantium               | 2.60 |
|                                           |      |                     |      |                                           |      | Quinella                              | 2.59 |
|                                           |      |                     |      |                                           |      | Ruminococcaceae,<br>GCA_900066225     | 2.56 |
|                                           |      |                     |      |                                           |      | Lachnospiraceae NK4B4                 | 2.52 |
|                                           |      |                     |      |                                           |      | Candidatus Solea ferrea               | 2.48 |
|                                           |      |                     |      |                                           |      | Oxalobacter                           | 2.41 |
|                                           |      |                     |      |                                           |      | Brachyspira                           | 2.39 |
|                                           |      |                     |      |                                           |      | Harryflintia                          | 2.32 |

**Table S37:** More abundant bacterial genera within the rectum of each host species based on LEfSe analysis between *A. speciosus* and either *A. argenteus* or *M. rufocanus*. LDA scores shown.

| Rectum                                    |      |                          |      |
|-------------------------------------------|------|--------------------------|------|
| <i>M. rufocanus</i> - <i>A. argenteus</i> |      |                          |      |
| <i>M. rufocanus</i>                       |      | <i>A. argenteus</i>      |      |
| Genus                                     | LDA  | Genus                    | LDA  |
| Ruminococcus 1                            | 3.88 | Alistipes                | 4.42 |
| Ruminiclostridium                         | 3.82 | Mycoplasma               | 4.38 |
| Eubacterium xylanophilum                  | 3.72 | Rikenellaceae RC9        | 4.37 |
| Candidatus Saccharimonas                  | 3.71 | Campylobacter            | 4.36 |
| Ruminococcaceae, UBA1819                  | 3.64 | Bacteroides              | 4.35 |
| Ruminiclostridium 6                       | 3.34 | Prevotellaceae, UCG_003  | 4.08 |
| Desulfovibrio                             | 3.28 | Escherichia-Shigella     | 3.97 |
| Acetatifactor                             | 3.27 | Prevotellaceae Ga6A1     | 3.91 |
| Ruminococcaceae, UCG_010                  | 3.25 | Rikenella                | 3.90 |
| Ruminococcaceae NK4A214                   | 3.06 | Streptococcus            | 3.73 |
| Millionella                               | 3.03 | Eubacterium nodatum      | 3.33 |
| Peptococcus                               | 3.03 | Prevotellaceae, UCG_001  | 3.10 |
| Ruminococcaceae, UCG_014                  | 3.03 | Muribaculum              | 3.03 |
| Anaeroplasm                               | 3.01 | Parasutterella           | 2.71 |
| Pygmaibacter                              | 2.92 | Lachnospiraceae, UCG_006 | 2.69 |
| Foumierella                               | 2.91 | Turicibacter             | 2.49 |
| Ruminococcaceae, UCG_009                  | 2.89 | Butyricoccus             | 2.42 |
| Ruminococcaceae, UCG_005                  | 2.88 |                          |      |
| Ruminococcaceae V9D2013                   | 2.87 |                          |      |
| Candidatus Soleaferrea                    | 2.66 |                          |      |
| Ureaplasma                                | 2.64 |                          |      |
| Clostridiales, Family XIII,<br>AD3011     | 2.48 |                          |      |

**Table S37 (continued):** More abundant bacterial genera within the rectum of each host species based on LEfSe analysis between *M. rufocanus* and *A. argenteus*.
